# Supplementary material for: Cross-sectional study on tobacco advertising, promotion and sponsorship (TAPS) and violations of tobacco sale regulations in Myanmar: do these factors affect current tobacco use among Myanmar high school students?
Source: PubMed Central journal article supplement — BMJ Open. 2020 Feb 12;10(2):e031933. doi: 10.1136/bmjopen-2019-031933 (PMC7045140; doi:10.1136/bmjopen-2019-031933), 2020-02-12
Supplement: bmjopen-2019-031933.draft_revisions.pdf [file bmjopen-2019-031933.draft_revisions.pdf]

# BMJ Open

BMJ Open is committed to open peer review. As part of this commitment we make the peer review history of every article we publish publicly available.

When an article is published we post the peer reviewers' comments and the authors' responses online. We also post the versions of the paper that were used during peer review. These are the versions that the peer review comments apply to.

The versions of the paper that follow are the versions that were submitted during the peer review process. They are not the versions of record or the final published versions. They should not be cited or distributed as the published version of this manuscript.

BMJ Open is an open access journal and the full, final, typeset and author-corrected version of record of the manuscript is available on our site with no access controls, subscription charges or pay-per-view fees (<http://bmjopen.bmj.com>).

If you have any questions on BMJ Open's open peer review process please email [info.bmjopen@bmj.com](mailto:info.bmjopen@bmj.com)

# BMJ Open

**A cross-sectional study on tobacco advertising, promotion and sponsorship (TAPS) and violations of tobacco sale regulations in Myanmar: Do they affect on the current smoking and smokeless tobacco use among Myanmar high school students?**

|                               |                                                                                                                                                                                                                                                                                                                                                                                                                                                                                                                                                                                                                                                                                                                                                                                                                                                                                                                                                                                                                                                                                                                                                       |
|-------------------------------|-------------------------------------------------------------------------------------------------------------------------------------------------------------------------------------------------------------------------------------------------------------------------------------------------------------------------------------------------------------------------------------------------------------------------------------------------------------------------------------------------------------------------------------------------------------------------------------------------------------------------------------------------------------------------------------------------------------------------------------------------------------------------------------------------------------------------------------------------------------------------------------------------------------------------------------------------------------------------------------------------------------------------------------------------------------------------------------------------------------------------------------------------------|
| Journal:                      | <i>BMJ Open</i>                                                                                                                                                                                                                                                                                                                                                                                                                                                                                                                                                                                                                                                                                                                                                                                                                                                                                                                                                                                                                                                                                                                                       |
| Manuscript ID                 | bmjopen-2019-031933                                                                                                                                                                                                                                                                                                                                                                                                                                                                                                                                                                                                                                                                                                                                                                                                                                                                                                                                                                                                                                                                                                                                   |
| Article Type:                 | Original research                                                                                                                                                                                                                                                                                                                                                                                                                                                                                                                                                                                                                                                                                                                                                                                                                                                                                                                                                                                                                                                                                                                                     |
| Date Submitted by the Author: | 27-May-2019                                                                                                                                                                                                                                                                                                                                                                                                                                                                                                                                                                                                                                                                                                                                                                                                                                                                                                                                                                                                                                                                                                                                           |
| Complete List of Authors:     | <p>Cho, Su Myat; Nagoya University Graduate School of Medicine Faculty of Medicine, Dept. of Healthcare Administration<br/>           Saw, Yu Mon; The University of Tokyo, Dept. of Community and Global Health, the Graduate School of Medicine<br/>           Latt, Nyi Nyi; Aung Myin Myint Mo Hospital, Gyobingauk<br/>           Saw, Thu Nandar; The University of Tokyo, Dept. of Community and Global Health<br/>           Htet, Hein; Nagoya Daigaku, Health Care Administration;<br/>           Khaing , Moe; Myanmar Ministry of Health and Sports<br/>           Than, Thet Mon; Myanmar Ministry of Health and Sports<br/>           Win, Ei Mon; Myanmar Ministry of Health and Sports<br/>           Aung , Zaw Zaw; Myanmar Ministry of Health and Sports<br/>           Kariya, Tetsuyoshi; Nagoya University Graduate School of Medicine Faculty of Medicine, Dept. of Healthcare Administration<br/>           Yamamoto, Eiko; Nagoya University Graduate School of Medicine Faculty of Medicine, Dept. of Healthcare Administration<br/>           Hamajima, Nobuyuki; Nagoya Univ, Department of Healthcare Administration</p> |
| Keywords:                     | Tobacco advertising, tobacco sale, current smoking and smokeless tobacco use, high school students, Myanmar                                                                                                                                                                                                                                                                                                                                                                                                                                                                                                                                                                                                                                                                                                                                                                                                                                                                                                                                                                                                                                           |
|                               |                                                                                                                                                                                                                                                                                                                                                                                                                                                                                                                                                                                                                                                                                                                                                                                                                                                                                                                                                                                                                                                                                                                                                       |

SCHOLARONE™  
Manuscripts

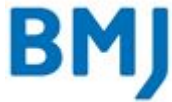

I, the Submitting Author has the right to grant and does grant on behalf of all authors of the Work (as defined in the below author licence), an exclusive licence and/or a non-exclusive licence for contributions from authors who are: i) UK Crown employees; ii) where BMJ has agreed a CC-BY licence shall apply, and/or iii) in accordance with the terms applicable for US Federal Government officers or employees acting as part of their official duties; on a worldwide, perpetual, irrevocable, royalty-free basis to BMJ Publishing Group Ltd ("BMJ") its licensees and where the relevant Journal is co-owned by BMJ to the co-owners of the Journal, to publish the Work in this journal and any other BMJ products and to exploit all rights, as set out in our [licence](#).

The Submitting Author accepts and understands that any supply made under these terms is made by BMJ to the Submitting Author unless you are acting as an employee on behalf of your employer or a postgraduate student of an affiliated institution which is paying any applicable article publishing charge ("APC") for Open Access articles. Where the Submitting Author wishes to make the Work available on an Open Access basis (and intends to pay the relevant APC), the terms of reuse of such Open Access shall be governed by a Creative Commons licence – details of these licences and which [Creative Commons](#) licence will apply to this Work are set out in our licence referred to above.

Other than as permitted in any relevant BMJ Author's Self Archiving Policies, I confirm this Work has not been accepted for publication elsewhere, is not being considered for publication elsewhere and does not duplicate material already published. I confirm all authors consent to publication of this Work and authorise the granting of this licence.

1  
2  
3 **A cross-sectional study on tobacco advertising, promotion and sponsorship (TAPS) and**  
4 **violations of tobacco sale regulations in Myanmar: Do they affect on the current**  
5 **smoking and smokeless tobacco use among Myanmar high school students?**  
6  
7  
8  
9

10  
11 Su Myat Cho<sup>1</sup>, Yu Mon Saw<sup>1,2</sup>, Nyi Nyi Latt<sup>3</sup>, Thu Nandar Saw<sup>4</sup>, Hein Htet<sup>5</sup>, Moe Khaing<sup>1,6</sup>,  
12 Thet Mon Than<sup>6</sup>, Ei Mon Win<sup>7</sup>, Zaw Zaw Aung<sup>7</sup>, Tetsuyoshi Kariya<sup>1,2</sup>, Eiko Yamamoto<sup>1</sup>,  
13 Nobuyuki Hamajima<sup>1</sup>  
14  
15

16  
17  
18  
19 *<sup>1</sup>Department of Healthcare Administration, Nagoya University Graduate School of Medicine,*  
20 *Nagoya, Japan*

21 *<sup>2</sup>Nagoya University Asian Satellite Campuses Institute, Nagoya, Japan*

22 *<sup>3</sup>AungMyinMyint Mo Hospital, Gyobingauk, Myanmar*

23 *<sup>4</sup>Department of Community and Global Health, Graduate School of Medicine, The University*  
24 *of Tokyo, Tokyo, Japan*

25 *<sup>5</sup>University of Medicine, Mandalay, Myanmar*

26 *<sup>6</sup>Department of Medical Services, Ministry of Health and Sports, NayPyi Taw, Myanmar*

27 *<sup>7</sup>Department of Public Health, Ministry of Health and Sports, NayPyi Taw, Myanmar*  
28  
29  
30  
31  
32  
33  
34  
35  
36  
37  
38

39 Corresponding author:

40 Yu Mon Saw

41  
42 Department of Healthcare Administration, Nagoya University Graduate School of Medicine,  
43 65 Tsurumai-cho, Showa-ku, Nagoya 466-8550, Japan

44 E-mail address: [sawyumon@med.nagoya-u.ac.jp](mailto:sawyumon@med.nagoya-u.ac.jp)  
45  
46  
47  
48

49 Word count- 3802  
50  
51  
52  
53  
54  
55  
56  
57  
58  
59  
60

## ABSTRACT

**Objectives:** To examine associations of current smoking and smokeless tobacco use with TAPS and illicit tobacco sales exposures among Myanmar high school students.

**Design:** A quantitative, cross-sectional study.

**Setting:** Seven high schools from both urban and rural areas of four states and regions in Myanmar.

**Participants:** In total, 1,174 (482 males and 692 females) high school students were recruited using a self-administered questionnaire.

**Main outcome measures:** Current smoking and smokeless tobacco use, defined as using at least one time of any kind of smoking or smokeless tobacco products within the past 30 days.

**Results:** The prevalence of TAPS exposures was 90.9% among high school students in Myanmar. Current smoking and smokeless tobacco use was positively associated with > 14 years old age group (AOR 9.81; 95%CI 4.54–21.19), being male (AOR 28.06; 95%CI 13.29–59.25), exposure to any kind of TAPS (AOR 6.59; 95%CI 2.33–18.64), had seen selling cigars inside or within 100 feet of the school premises (AOR 4.17; 95%CI 1.65–10.58), had seen selling or giving cigars to minors (AOR 6.40; 95%CI 2.18–19.12), and had seen selling or distributing cigars by minors (AOR 2.42; 95% CI 1.42–4.10). Ever received health education about tobacco products (AOR 0.45; 95% CI 0.27–0.78), and higher perception score of smoking and smokeless tobacco products (AOR 0.17; 95% CI 0.10–0.30) were negatively associated with current smoking or smokeless tobacco use.

**Conclusions:** An alarming prevalence of TAPS exposure was found among Myanmar high school students. TAPS exposure and violations of tobacco sale regulations were strong risk factors for current smoking or smokeless tobacco use among Myanmar high school students while ever received health education about tobacco products was found as one of the protective factors. Specific smokeless tobacco sale regulations for minors are immediately needed in Myanmar.

**Key words:** Tobacco advertising, tobacco sale, current smoking and smokeless tobacco use, high school students, Myanmar

## STRENGTHS AND LIMITATIONS OF THIS STUDY

- This study is the first in Myanmar to report the associations of current smoking and smokeless tobacco use with TAPS and illicit tobacco sales exposures among high school students.
- The findings of this study cannot be generalized for the whole nation though it was conducted among 1,174 students from two states and two regions out of a total of seven states, seven regions, and one territory in Myanmar.
- This study could not confirmed the causal relationships of the current smoking and smokeless tobacco use among high school students because of the cross-sectional nature of our study.
- Due to the limitations of the cross-sectional study design, this study calls for further TAPS-related interventional and longitudinal studies to explore Myanmar adolescents' smoking and smokeless tobacco use behaviors.

## INTRODUCTION

“Tobacco use,” defined as the use of any type of smoking or smokeless tobacco,<sup>1)</sup> is regarded as an important public health concern worldwide. Globally, it was estimated that 24 million (7%) adolescents aged between 13 and 15 years smoked cigarettes and 13.4 million (3.6%) used smokeless tobacco products in 2017.<sup>1)</sup> In the United States, it was reported that 4 million high school students were current tobacco users in 2018.<sup>2)</sup> In Southeast Asia region, tobacco use prevalence was 5.7% and smokeless tobacco use prevalence was 7.2% among adolescents.<sup>1)</sup> A recent multicounty study reported that the prevalence of adolescent smokeless tobacco use in the World Health Organization (WHO) South-East Asia Region was highest in Bhutan (23.2%), followed by Nepal (16.2%), Timor-Leste (14.2%), Myanmar (9.8%), India (9.0%), Sri Lanka (8.5%), the Maldives (6.2%), Bangladesh (5.9%), and Thailand (5.7%).<sup>3)</sup> Thus, Myanmar ranked the fourth-highest adolescent smokeless tobacco use among these nine countries.

Tobacco use is responsible for five million deaths every year globally, a figure that is expected to rise to 10 million per year by 2030.<sup>4)</sup> Moreover, it is estimated that 600,000 people die from the effects of second-hand smoke, accounting for roughly 1% of global mortality.<sup>5)</sup> Adolescents are highly vulnerable to addiction to the nicotine in tobacco. A recent study has shown that the earlier people begin nicotine dependence, the more likely they are to

1  
2  
3  
4 become addicted to smoking in adulthood.<sup>6)</sup> Moreover, nicotine may harm brain development  
5  
6  
7 in adolescence.<sup>7)</sup> Studies have shown adolescent smoking is associated with poor academic  
8  
9  
10 performance <sup>8)</sup> and attention and cognitive deficits.<sup>9)</sup>  
11  
12

13  
14 Since 2001, the Global Youth Tobacco Survey (GYTS) has been implemented every  
15  
16 three to five years in Myanmar to monitor school-going students' tobacco use. The 2016  
17  
18 GYTS reported that 10.6% of students used tobacco (21.1% for boys and 2.4% for girls). The  
19  
20 prevalence of smokeless tobacco use was 11.0% for boys and 1.5% for girls.<sup>10)</sup> In parallel  
21  
22  
23 with the GYTS, Myanmar has been conducting the nationwide Global School-based Student  
24  
25 Health Survey (GSHS) to monitor the understanding of health risk behaviours among students  
26  
27  
28 aged between 13 and 17 years, including students' tobacco use. The GSHS survey reported  
29  
30  
31 that the prevalence of current tobacco smoking and current smokeless tobacco use in  
32  
33  
34 Myanmar students were 7.2% and 8.5%, respectively, in 2016.<sup>11)</sup>  
35  
36  
37  
38  
39  
40

41  
42 More than a decade ago, Myanmar signed the WHO Framework Convention on  
43  
44 Tobacco Control (FCTC) and enacted the first Tobacco Control Law in 2006, regulating  
45  
46 tobacco advertising, promotion, and sponsorship (TAPS) and tobacco sales among minors.<sup>10)</sup>  
47  
48  
49 Subsequently, the restrictions on smoking in all indoor public places, the introduction of  
50  
51 graphic health warnings on tobacco product packaging, and the raising of tobacco product  
52  
53 taxes were also promulgated. However, the prevalence of current tobacco use among  
54  
55  
56 Myanmar youths had not changed significantly over the past 15 years.<sup>10)</sup>  
57  
58  
59  
60



1  
2  
3  
4 A comparison of the 2007 and the 2016 GSHS rounds also revealed that the  
5  
6  
7 prevalence of cigarette smoking had increased significantly, from 2.0% to 6.7%.<sup>11)</sup> Although  
8  
9  
10 the Tobacco Control Law has already banned tobacco sales to minors under 18, adolescent  
11  
12  
13 smokers can still buy cigarettes from large stores, retail shops, or street vendors very easily  
14  
15  
16 without being denied by tobacco sellers.<sup>10)</sup> These alarming findings indicate the failure of  
17  
18  
19 tobacco control efforts for young people in Myanmar.  
20  
21  
22

23 Although the Tobacco Control Law in Myanmar prohibits TAPS activities by the  
24  
25  
26 tobacco industry, TAPS activities are still common in Myanmar. Most tobacco companies  
27  
28  
29 distribute tobacco products and personal goods with tobacco product labels free of charge or  
30  
31  
32 as gifts. According to the 2016 Myanmar GYTS report, 8.7% of boys and 3.6% of girls  
33  
34  
35 reported that tobacco companies had offered free tobacco products, and 7.3% of boys and  
36  
37  
38 4.2% of girls reported owning something with a tobacco brand logo.<sup>10)</sup> Furthermore, 83.4% of  
39  
40  
41 the students reported noticing someone using tobacco products on television or in videos or  
42  
43  
44 movies.<sup>10)</sup>  
45  
46  
47

48 Researchers from other parts of the world have reported that TAPS exposure can  
49  
50  
51 affect adolescent smoking behaviours.<sup>12-15)</sup> At present, research in Myanmar is limited on the  
52  
53  
54 patterns of young people's smoking and smokeless tobacco use and their connection to TAPS  
55  
56  
57 exposure. Our previous study,<sup>21)</sup> among the same study participants, revealed the low  
58  
59  
60

1  
2  
3  
4 awareness of the Tobacco Control Law among Myanmar high school students, but we did not  
5  
6  
7 examine how TAPS exposure and violations of tobacco sales regulations might affect  
8  
9  
10 Myanmar high school students' smoking and smokeless tobacco use. The present study aims  
11  
12  
13 to investigate (1) the prevalence of TAPS and illicit tobacco sale exposures and (2) their  
14  
15  
16 associations with current smoking and smokeless tobacco use among Myanmar high school  
17  
18  
19 students.

## 22 23 **MATERIALS AND METHODS**

### 26 27 *Study population*

28  
29  
30 A cross-sectional study was conducted among grade 10 and 11 high school students from  
31  
32  
33 seven high schools in Shan State, Mon State, Bago region, and Magway region in Myanmar.

34  
35  
36 A simple random sampling using a drawing method was applied to select the study areas and  
37  
38  
39 schools. The details of the sampling procedure have been described elsewhere.<sup>21)</sup> In total,  
40  
41  
42 1,339 high school students answered the self-administrated questionnaire. Of these, 165 were  
43  
44  
45 excluded due to missing or uncompleted response on TAPS exposure questions. Therefore,  
46  
47  
48 the total number of participants was 1,174 (482 males and 692 females).

### 51 52 *Data collection*

53  
54  
55  
56 Data were collected by using a pre-tested, anonymous, self-administered questionnaire. The  
57  
58  
59 questionnaire in the Myanmar language contained 40 questions, covering nine components: 1)  
60

1  
2  
3  
4 background information, 2) experience with tobacco products, 3) exposure to second-hand  
5  
6  
7 smoking, 4) perception of smoking and smokeless tobacco products, 5) sale of tobacco, 6)  
8  
9  
10 health warnings and information, 7) tobacco advertisement, promotion, and sponsorship, 8)  
11  
12  
13 smoke-free areas, and 9) the Tobacco Control Law and its enforcement. Permissions were  
14  
15  
16 obtained from local educational steering committees and authorities, schools' authorities, and  
17  
18  
19 teachers after a thorough explanation of the study's objectives and the contents of the  
20  
21  
22 questionnaire. Before taking part in the study, researchers explained clearly the nature and  
23  
24  
25 aims of this study, and the questionnaire's contents to all participants.  
26  
27  
28

### 29 ***Study measures***

#### 32 ***Dependent variable***

33  
34  
35  
36 The outcome variable was "current smoking and smokeless tobacco use" among high school  
37  
38  
39 students. It was defined as using any kind of smoking or smokeless tobacco product at least  
40  
41  
42 one occasion within the 30 days preceding the survey.  
43  
44  
45

#### 46 ***Independent variables***

47  
48  
49  
50 The independent variables were socio-demographic characteristics, smoking exposure at  
51  
52  
53 home and school, perception and receiving health education about tobacco products, illicit  
54  
55  
56 sale exposure, and exposure to any kind of TAPS. The "exposure to any kind of TAPS" was  
57  
58  
59

1  
2  
3  
4 created using the following variables: 1) having seen or heard tobacco advertisings and  
5  
6  
7 sponsorship in any form, 2) having seen any goods displaying the label of a cigar or tobacco  
8  
9  
10 products being used in promotion, and 3) having seen any toy, comestible, or wares made in  
11  
12  
13 the form of a cigar. If a student had had at least one TAPS exposure, the response was  
14  
15  
16 counted as a “Yes,” and if they had never experienced exposure, their response was counted  
17  
18  
19 as a “No.”  
20  
21  
22

23 Exposure to the illicit sales of tobacco was measured by using the following  
24  
25  
26 variables: 1) having seen selling cigars inside or within 100 feet of the school premises within  
27  
28  
29 the last 12 months, 2) having seen selling or giving cigars to minors within the last 12 months,  
30  
31  
32 3) having seen selling or distributing cigars by minors within the last 12 months, and 4)  
33  
34  
35 having seen selling cigarettes singly or in packs containing less than 20 within the last 12  
36  
37  
38 months. The word “cigar” used in our variables meant “any cigarette, cheroot, cigar, or  
39  
40  
41 smoking pipe or any other similar material prepared by any means for inhalation of smoke  
42  
43  
44 emitted from the burning of a tobacco product,” as described in Myanmar’s Tobacco Control  
45  
46  
47 Law.<sup>16)</sup>  
48  
49  
50

### 51 ***Study analysis***

52  
53

54 The data were coded, entered, and analysed using the Statistical Package for Social Science  
55  
56  
57 (SPSS) software program version 24.0 (IBM SPSS Inc.). Categorical data were analysed by  
58  
59  
60

1  
2  
3  
4 chi-square tests for hypothesis testing. For multiple logistic regression analysis, all the  
5  
6  
7 variables were re-coded on a dichotomous scale. All analyses were two tailed, setting  $p < 0.05$   
8  
9  
10 as significance.

## 11 12 13 14 **RESULTS**

15  
16  
17 Table 1 shows the characteristics of the study participants by gender. Most of the participants  
18  
19  
20 (84.7%) were younger than or equal to 15 years of age. More than two thirds of the students  
21  
22  
23 (68.5% of males and 67.1% of females) were grade 10 students. Of those who took part,  
24  
25  
26 25.3% of male and 1.3% of female students were current users of smoking and smokeless  
27  
28  
29 tobacco at the time of survey. Male students had more exposure to parents smoking (6.0%),  
30  
31  
32 siblings smoking (11.4%), and peers smoking (9.3%) than did female students. Nearly two  
33  
34  
35 thirds of females (66.0%) reported receiving health education on smoking and smokeless  
36  
37  
38 tobacco, compared to 52.7% of males. With regard to the perception of smoking and  
39  
40  
41 smokeless tobacco products, out of eight items, we set the mean score of seven as the cut-off  
42  
43  
44 point. Overall, 68.7% of males and 83.2% females scored more than seven.

45  
46  
47  
48 Table 2 presents different kinds of TAPS exposures and its associations with current  
49  
50  
51 smoking and smokeless tobacco use among the study participants. In total, 90.9% had TAPS  
52  
53  
54 exposure in any form. The findings indicate that 71.7% had seen or heard of tobacco  
55  
56  
57 advertisement and sponsorship in any form, and 68.1% had seen goods displaying the label of

1  
2  
3  
4 a cigar or other tobacco products being used in promotions. One out of three students had  
5  
6  
7 seen any toys, comestible or wares made in the form of a cigar. More than one third of the  
8  
9  
10 participants (35.3%) had seen or heard tobacco advertisements in sponsorship or support of  
11  
12  
13 sports, fun fairs, exhibitions, or other social activities.  
14  
15  
16

17 Table 3 describes illicit tobacco sale exposures and their associations with current  
18  
19 smoking and smokeless tobacco use among the study participants. Within the last 12 months,  
20  
21  
22 more than 80.0% had exposed to selling cigars inside or within 100 feet of the school  
23  
24  
25 premises, selling or giving cigars to minors, and selling cigarettes singly or in packs less than  
26  
27  
28 20. Nearly 56.0% had seen selling or distributing cigars by minors.  
29  
30  
31

32 Table 4 presents the unadjusted odds ratio (UOR), adjusted odds ratio (AOR), and  
33  
34  
35 95% confidence intervals (CI) of current smokers and smokeless tobacco users among  
36  
37  
38 Myanmar high school students. In the binary logistic regression, being a grade 11 student  
39  
40  
41 (UOR 3.24; 95% CI 2.24-4.70) and seeing someone selling cigarettes, either singly or in  
42  
43  
44 packs of less than 20 (UOR 7.45; 95% CI 2.34–23.70), were associated with current smoking  
45  
46  
47 and smokeless tobacco use.  
48  
49  
50

51 From the multiple logistic regression, current smoking and smokeless tobacco use  
52  
53  
54 was found to be positively associated with age >14 years old (AOR 9.81; 95% CI 4.54–  
55  
56  
57 21.19); being male (AOR 28.06; 95% CI 13.29–59.25); exposure to any kind of TAPS (AOR  
58  
59  
60

1  
2  
3  
4 6.59; 95% CI 2.33–18.64); had seen selling cigars inside or within 100 feet of the school  
5  
6  
7 premises within the last 12 months (AOR 4.17; 95% CI 1.65–10.58); had seen selling or  
8  
9  
10 giving cigars to minors within the last 12 months (AOR 6.40; 95% CI 2.18–19.12); and had  
11  
12  
13 seen selling or distributing cigars by minors within the last 12 months (AOR 2.42; 95% CI  
14  
15  
16 1.42–4.10). Ever received health education about tobacco (AOR 0.45; 95% CI 0.27–0.78) and  
17  
18  
19 higher perception score of smoking and smokeless tobacco products (AOR 0.17; 95% CI  
20  
21  
22 0.10–0.30) were negatively associated with current smoking and smokeless tobacco use  
23  
24  
25 (Table 3).  
26  
27  
28

## 29 DISCUSSION

30  
31  
32 To the best of our knowledge, this is the first study to report the associations of current  
33  
34  
35 smoking and smokeless tobacco use with TAPS and illicit tobacco sale exposures among high  
36  
37  
38 school students in Myanmar. Majority of the study participants reported having exposures to  
39  
40  
41 TAPS and illicit tobacco sales. TAPS exposure increases the odds of current smoking and  
42  
43  
44 smokeless tobacco use among high school students. Similarly, being aged above 14 years,  
45  
46  
47 being male, and having been exposed to illicit tobacco sales were risk factors for current  
48  
49  
50 smoking and smokeless tobacco use among high school students. However, having received  
51  
52  
53 health education and having a higher perception score of smoking and smokeless tobacco use  
54  
55  
56 were negatively associated with current smoking and smokeless tobacco use.  
57  
58  
59  
60

1  
2  
3  
4 In this study, a high prevalence of TAPS exposure (91%) was found among high  
5  
6  
7 school students in Myanmar, a country that has completely banned all forms of direct or  
8  
9  
10 indirect TAPS, including Corporate Social Responsibility (CSR) activities by tobacco  
11  
12  
13 industry.<sup>16)</sup> Myanmar has a well-established Tobacco Control Law, the “Control of Smoking  
14  
15  
16 and Consumption of Tobacco Product Law,” which has been enacted since 2006.<sup>16)</sup>  
17  
18  
19 Nevertheless, the lack of enforcement of this law in Myanmar creates opportunities for  
20  
21  
22 tobacco companies and retailers to violate it. Our findings highlighted the urgent need to  
23  
24  
25 enforce this law in Myanmar to reduce TAPS exposure among adolescents in order to  
26  
27  
28 decrease tobacco use.

31  
32 The global tobacco industry has been focusing on expanding its market in developing  
33  
34 countries that have low tobacco taxes, partial TAPS bans, and weak law enforcement of  
35  
36  
37 TAPS regulations, rather than developed countries with high tobacco taxes, comprehensive  
38  
39  
40 complete TAPS bans, and strict implementation of TAPS regulations.<sup>17-20)</sup> Moreover, it is not  
41  
42  
43 rare to see sponsored events and CSR activities by tobacco companies, violating the TAPS  
44  
45  
46 regulations and reframing tobacco products’ image among Myanmar youths.<sup>21, 22)</sup> Nigerian  
47  
48  
49 researchers have reported that exposure to events sponsored by the tobacco industry was  
50  
51  
52 associated with current cigarette use and increased susceptibility to cigarette use.<sup>13)</sup> This study  
53  
54  
55 encourages Myanmar policy makers to formulate specific TAPS regulations addressing newly  
56  
57  
58 developed smoking and smokeless tobacco products and complete comprehensive TAPS  
59  
60



1  
2  
3  
4 bans, including cross-border TAPS. Local authorities need to monitor TAPS among Myanmar  
5  
6 youths strictly and to punish the tobacco companies, stores, and retailers violating TAPS  
7  
8 regulations.  
9  
10

11  
12  
13 High school students having TAPS exposure in any form were six times more likely  
14  
15 to smoke or use smokeless tobacco products than those without any TAPS exposure.  
16  
17

18  
19 Adolescent students, in a phase of life full of curiosity, are vulnerable to adopting risky life-  
20  
21 style behaviours such as smoking or smokeless tobacco use.<sup>23, 24)</sup> A positive association  
22  
23 between exposure to cigarette advertisements and initiating smoking has been reported among  
24  
25 Indonesian students.<sup>25)</sup> A longitudinal study conducted in Germany also pointed out that the  
26  
27 adjusted relative risk for established smoking and daily smoking were raised by 38% and  
28  
29 30%, respectively, with each additional 10 tobacco advertisements.<sup>26)</sup>  
30  
31  
32  
33  
34  
35  
36  
37

38 In addition, a recent study from Myanmar has reported that only half of high school  
39  
40 students had heard about the Tobacco Control Law, and none of the study participants had  
41  
42 ever heard of any reporting or punishing for any violation of the Tobacco Control Law  
43  
44 banning TAPS activities and tobacco sales among minors.<sup>21)</sup> Our study suggests that  
45  
46 Myanmar high school students should be properly informed not only about the dangers of  
47  
48 TAPS exposure but also about the country's Tobacco Control Law and its punishments.  
49  
50  
51  
52  
53  
54  
55

56 In this study, the prevalence of current smoking and smokeless tobacco use among  
57  
58  
59  
60

1  
2  
3  
4 Myanmar high school students was 11.2%, higher than the national figure of 9.8% reported in  
5  
6  
7 the 2016 WHO GSHS for 13- to 17-year-old students in Myanmar.<sup>11)</sup> Our study also reported  
8  
9  
10 that male high school students were more likely to be current smoking and smokeless tobacco  
11  
12  
13 users than their peers were. A sub-national-level study also reported a considerably high  
14  
15  
16 prevalence of smoking (34.7%) and smokeless tobacco use (28.3%) among high school  
17  
18  
19 students.<sup>22)</sup> The findings recommend Myanmar policy makers to consider smoking and  
20  
21  
22 smokeless tobacco use among adolescents as a priority public health concern and to put more  
23  
24  
25 effort into smoking and smokeless tobacco control measures.  
26  
27  
28

29 In Myanmar, it has been reported that there were only three full-time staff assigned  
30  
31  
32 to national tobacco control, covering 2,080,000 smokers per each.<sup>31)</sup> The country also has  
33  
34  
35 insufficient government budget for tobacco control and no innovative health promotion  
36  
37  
38 funding mechanism using tobacco taxes.<sup>31)</sup> To tackle the current situation in Myanmar,  
39  
40  
41 effective implementation of tobacco control measures is needed to reduce current smoking  
42  
43  
44 and smokeless tobacco use, and human and financial resources for national tobacco control  
45  
46  
47 should be improved.  
48  
49

50  
51 For the implementation of Article 6 of the WHO FCTC, increasing tobacco tax, is a  
52  
53  
54 cost-effective demand-reducing measure in global tobacco control.<sup>31)</sup> However, cigarettes in  
55  
56  
57 Myanmar are relatively cheap, indicating that the country's tobacco tax policies need to be  
58  
59  
60 reevaluated. In the Association of Southeast Asian Nations (ASEAN), the price of the most

1  
2  
3  
4 popular local cigarette brand in Myanmar is the second lowest (0.6 USD/20-stick pack), and  
5  
6  
7 that of the most popular foreign brand in Myanmar is the fourth highest (2.11 USD/20-stick  
8  
9  
10 pack).<sup>31)</sup> This indicates a gap in tax differences between local and foreign brands. The price  
11  
12  
13 that stops youth from smoking in Myanmar was reported as being above 11 USD/20-stick  
14  
15  
16 pack, the lowest among ASEAN.<sup>31)</sup> Therefore, the Myanmar government should reevaluate  
17  
18  
19 tobacco tax levels and adjust tax policies to decrease smoking and smokeless tobacco use and  
20  
21  
22 TAPS exposures.  
23  
24

25 In this study, students who had seen someone selling cigars inside or within 100 feet  
26  
27  
28 of the school premises during the last 12 months were four times more likely to be current  
29  
30  
31 users of smoking and smokeless tobacco products than their peers were. It is illegal to sell  
32  
33  
34 cigars inside or within 100 feet of a school premises in Myanmar.<sup>16)</sup> This finding implies that  
35  
36  
37 the lack of monitoring and reporting of illicit tobacco sales inside or near school premises  
38  
39  
40 exerts an influence on current tobacco use among Myanmar high school students. In addition,  
41  
42  
43 these illicit tobacco sales provide easy access to tobacco for students as well as for school  
44  
45  
46 personnel, triggering second-hand smoking exposure and student curiosity about tobacco use.  
47  
48  
49 Therefore, school personnel, students, and parents should monitor and report such illicit  
50  
51  
52 tobacco sales to local authorities and actions should be taken according to rules and  
53  
54  
55 regulations.  
56  
57  
58  
59  
60

1  
2  
3  
4 Yet there is no specific regulation on smokeless tobacco sales and distributions to  
5  
6  
7 and by minors in Myanmar, the selling or giving of cigars to minors under 18 and the selling  
8  
9  
10 or distributing of cigars by minors under 18 are illegal.<sup>16)</sup> Nonetheless, 82.5% of participants  
11  
12  
13 in this study reported that they had seen someone selling or giving cigars to minors within the  
14  
15  
16 last 12 months, and 55.6% of the participants reported having seen selling or distributing  
17  
18  
19 cigars by minors within the last 12 months. The study also revealed that seeing these two  
20  
21  
22 illicit tobacco activities within the last 12 months were significantly associated with current  
23  
24  
25 tobacco use among the study participants. A study of adolescents in the United States has also  
26  
27  
28 reported an association between smokeless tobacco use and smoking.<sup>28)</sup> In order to reduce  
29  
30  
31 current tobacco use among Myanmar high school students, this study recommends the urgent  
32  
33  
34 need of specific smokeless tobacco sale regulations to and by minors in Myanmar, and the  
35  
36  
37 strict law enforcement on all smoking and smokeless tobacco sales or distributions to and by  
38  
39  
40 minors in the country.

41  
42  
43 Another common violation of the Tobacco Control Law in Myanmar is the sale of  
44  
45  
46 cigarettes singly or in packs of less than 20. Despite the significant price difference<sup>31)</sup> both  
47  
48  
49 foreign and local brands become affordable for smokers when they are sold singly or in packs  
50  
51  
52 of less than 20. Such sales are contrary to the demand-reducing tobacco control measures of  
53  
54  
55 the national policy and negatively affect the tobacco use of all age groups, especially  
56  
57  
58 adolescents.

1  
2  
3  
4 In addition, other smoking and smokeless tobacco products, such as cheroots, cigars,  
5  
6  
7 pipes, betel quids, etc., can be purchased singly or in small quantities in Myanmar. To reduce  
8  
9  
10 current smoking and smokeless tobacco use in all age groups, our study recommends that the  
11  
12  
13 2006 Tobacco Control Law be updated to address the sale and purchase of all forms of  
14  
15  
16 smoking and smokeless tobacco products in small quantities, along with strict law  
17  
18  
19 enforcement, especially among minors.  
20  
21

22 The findings of this study imply that effective health education and high perception  
23  
24  
25 of smoking and smokeless tobacco use can be protective factors against current tobacco use  
26  
27  
28 among Myanmar high school students. In this study, students who had ever received health  
29  
30  
31 education about smoking and smokeless tobacco use and those with the higher perception  
32  
33  
34 score of smoking and smokeless tobacco products were less likely to be current smoking and  
35  
36  
37 smokeless tobacco users than their counterparts were. Nearly two thirds of the participants  
38  
39  
40 had ever received health education about smoking and smokeless tobacco use, and nearly  
41  
42  
43 80% had the higher perception score of smoking and smokeless tobacco use. Health education  
44  
45  
46 programs and tobacco control measures targeting the young should address the newly  
47  
48  
49 developed and popular tobacco products like electronic cigarettes, shisha, pipes, menthol and  
50  
51  
52 fruit-flavored cigarettes etc. Youths' awareness on not only the harms of tobacco products but  
53  
54  
55 also the country's Tobacco Control Law should be promoted.  
56  
57  
58  
59  
60

1  
2  
3  
4 The study findings also revealed that 10.7% of the current tobacco users were 14  
5  
6  
7 years old or less. Another Myanmar researcher has reported that the average age of first  
8  
9  
10 tobacco use is 14 years.<sup>22)</sup> Therefore, tobacco control intervention measures should be  
11  
12  
13 introduced to Myanmar high school students before the age of 14. Awareness of the Tobacco  
14  
15  
16 Control Law remains quite low in Myanmar.<sup>21, 22)</sup> Furthermore, the provision of health  
17  
18  
19 education via youth-friendly media, such as the internet, mobile applications, and social  
20  
21  
22 networking services, may receive more attention from high school students.  
23  
24

25 In contrast to other studies,<sup>21, 22)</sup> parental smoking, sibling smoking, and peer  
26  
27  
28 smoking were not found to be associated with current smoking and smokeless tobacco use in  
29  
30  
31 this study. This may be because most of the study participants did not have exposure to  
32  
33  
34 parents, siblings, or peers who smoked. Having high knowledge and perception about tobacco  
35  
36  
37 use may also have prevented them from using tobacco.<sup>22)</sup>  
38  
39

40 Despite being the very first study in Myanmar reporting the associations of current  
41  
42  
43 smoking and smokeless tobacco use, with TAPS and illicit tobacco sale exposures among  
44  
45  
46 Myanmar high school students, the present study did not explore the associations between  
47  
48  
49 initiation or daily tobacco use, and TAPS and illicit tobacco sales among Myanmar high  
50  
51  
52 school students. Yet this study was conducted among 1,174 high school students from two  
53  
54  
55 states and two regions out of a total of seven states, seven regions and one territory of  
56  
57  
58 Myanmar, its findings cannot be generalized for the whole nation. Due to the limitations of  
59  
60

1  
2  
3  
4 cross-sectional nature of our study, we recommend further interventional or longitudinal  
5  
6  
7 studies of TAPS and sales exposure for a better understanding of adolescent tobacco use in  
8  
9  
10 Myanmar,

## 11 12 13 **CONCLUSIONS**

14  
15  
16 This study reported a high prevalence of TAPS and illicit tobacco sales exposures among  
17  
18  
19 Myanmar high school students. Current smoking and smokeless tobacco use among Myanmar  
20  
21  
22 high school students was statistically associated with overall TAPS exposure. Violations of  
23  
24  
25 tobacco sales regulations were reported to be strong risk factors for current smoking and  
26  
27  
28 smokeless tobacco use among Myanmar high school students. Our findings highlight that the  
29  
30  
31 need for Myanmar's Tobacco Control Law enforcement is at an alarming stage. Sales and  
32  
33  
34 purchase of not only cigarettes but also all forms of smoking and smokeless tobacco products  
35  
36  
37 in small quantities should be regulated. Specific smokeless tobacco sale regulations for  
38  
39  
40 minors are immediately needed in the country.  
41  
42  
43

## 44 45 **ABBREVIATIONS**

|    |      |                                                 |
|----|------|-------------------------------------------------|
| 46 |      |                                                 |
| 47 |      |                                                 |
| 48 | TAPS | Tobacco Advertising, Promotion, and Sponsorship |
| 49 |      |                                                 |
| 50 |      |                                                 |
| 51 | AOR  | Adjusted Odds Ratios                            |
| 52 |      |                                                 |
| 53 |      |                                                 |
| 54 | UOR  | Unadjusted Odds Ratios                          |
| 55 |      |                                                 |
| 56 |      |                                                 |
| 57 | CI   | Confidence Intervals                            |
| 58 |      |                                                 |

|    |       |                                           |
|----|-------|-------------------------------------------|
| 1  |       |                                           |
| 2  |       |                                           |
| 3  |       |                                           |
| 4  | WHO   | World Health Organization                 |
| 5  |       |                                           |
| 6  |       |                                           |
| 7  | GYTS  | Global Youth Tobacco Survey               |
| 8  |       |                                           |
| 9  |       |                                           |
| 10 | GSHS  | Global School-based Student Health Survey |
| 11 |       |                                           |
| 12 |       |                                           |
| 13 | FCTC  | Framework Convention on Tobacco Control   |
| 14 |       |                                           |
| 15 |       |                                           |
| 16 | SPSS  | Statistical Package for Social Science    |
| 17 |       |                                           |
| 18 |       |                                           |
| 19 | IBM   | International Business Machines           |
| 20 |       |                                           |
| 21 |       |                                           |
| 22 | CSR   | Corporate Social Responsibility           |
| 23 |       |                                           |
| 24 |       |                                           |
| 25 | ASEAN | Association of South-East Asian Nations   |
| 26 |       |                                           |
| 27 |       |                                           |
| 28 | USD   | The United States Dollar                  |
| 29 |       |                                           |
| 30 |       |                                           |
| 31 |       |                                           |
| 32 |       |                                           |
| 33 |       |                                           |
| 34 |       |                                           |
| 35 |       |                                           |
| 36 |       |                                           |
| 37 |       |                                           |
| 38 |       |                                           |
| 39 |       |                                           |
| 40 |       |                                           |
| 41 |       |                                           |
| 42 |       |                                           |
| 43 |       |                                           |
| 44 |       |                                           |
| 45 |       |                                           |
| 46 |       |                                           |
| 47 |       |                                           |
| 48 |       |                                           |
| 49 |       |                                           |
| 50 |       |                                           |
| 51 |       |                                           |
| 52 |       |                                           |
| 53 |       |                                           |
| 54 |       |                                           |
| 55 |       |                                           |
| 56 |       |                                           |
| 57 |       |                                           |
| 58 |       |                                           |
| 59 |       |                                           |
| 60 |       |                                           |

## ACKNOWLEDGEMENTS

The authors would like to thank Ministry of Health and Sports and Ministry of Education in Myanmar for granting a permission to collect the data at high schools. We also would like to thank the local authorities in the survey areas, the staff from participating schools, last but not least, all the high school students those who participated voluntarily in this study.

## Funding statement

This research received no specific grant from any funding agency in the public, commercial or not-for-profit sectors.

## Data sharing statement

No additional data are available.



### **Author contributions**

YMS and NNL conceptualised the study and designed the study. NNL, and TNS contributed to data collection and data acquisition. YMS, TNS, HH, and SMC performed data analyses and data interpretations. YMS, HH, and SMC wrote the first draft of the manuscript. MK, TMT, EMW, and ZZA contributed to data acquisition. NH contributed to the study design, data interpretation, and revising the manuscript. TK and EY revised the manuscript. All authors had full access to the data, and take responsibility to the accuracy of data analysis. All authors approved the final manuscript and agreed to submit it for publication and take accountability.

### **Ethical approval and consent to participate**

This study was approved by the Department of Medical Services, Ministry of Health, Myanmar (Letter No. 617 of Planning/Research issued on August 26, 2015), and the Ministry of Education, Myanmar (Letter No. 12125 of Information/Research issued on October 19, 2015), as well as the ethical review committee of Nagoya University School of Medicine (No. 6518 issued on August 31, 2015). All data collection and analytical processes retained anonymity for privacy and confidentiality. The locations, names, and numbers of the eligible participants of the schools involved were not documented.

### **Competing interests**

All authors declared no conflicts of interest for this study.

### **Additional file**

There is no additional files.

## REFERENCES

1. World Health Organization. *WHO global report on trends in prevalence of tobacco smoking 2000–2025, second edition*.  
<https://www.who.int/tobacco/publications/surveillance/trends-tobacco-smoking-second-edition/en/>. Accessed May 5, 2019.
2. Gentzke AS, Creamer M, Cullen KA, et al. Vital Signs: Tobacco Product Use among Middle and High School Students - United States, 2011–2018. *MMWR Morb Mortal Wkly Rep*. 2019;68(6):157–164. doi:10.15585/mmwr.mm6806e1.
3. Sinha DN, Rizwan SA, Aryal KK, Karki KB, Zaman MM, Gupta PC. Trends of smokeless tobacco use among adults (aged 15–49 years) in Bangladesh, India and Nepal. *Asian Pac J Cancer Prev*. 2015;16(15):6561–6568.
4. World Health Organization. *WHO global report: mortality attributable to tobacco*.[https://www.who.int/tobacco/publications/surveillance/rep\\_mortality\\_attributable/en/](https://www.who.int/tobacco/publications/surveillance/rep_mortality_attributable/en/). Accessed April 27, 2019.
5. Oberg M, Jaakkola MS, Woodward A, Peruga A, Prüss-Ustün A. *Worldwide burden of disease from exposure to second-hand smoke: a retrospective analysis of data from 192 countries*. *Lancet*. 2011;377(9760):139–146. doi:10.1016/S01406736(10)61388-8.
6. Selya AS, Dierker L, Rose JS, Hedeker D, Mermelstein RJ. Early-emerging nicotine dependence has lasting and time-varying effects on adolescent smoking behavior. *Prev Sci*. 2016;17(6):743–750. doi:10.1007/s11121-016-0673-0.
7. Centers for Disease Control and Prevention. *The health consequences of smoking- 50 years of progress: A report of the Surgeon General*.  
<https://www.surgeongeneral.gov/library/reports/50-years-of-progress/full-report.pdf>. Accessed April 29, 2019.
8. Robert PO, Kuipers MAG, Rathmann K, et al. Academic performance and adolescent smoking in 6 European cities: the role of friendship ties. *Int J Adolesc Youth*. 2019;24(1):125–135. doi:10.1080/02673843.2018.1475288.
9. Treur JL, Willemsen G, Bartels M, et al. Smoking during adolescence as a risk factor for attention problems. *Biol Psychiatry*. 2015;78(9):656–63.  
doi:10.1016/j.biopsych.2014.06.019.
10. World Health Organization. *Report of fifth Global Youth Tobacco Survey (GYTS) Myanmar, 2016*. <https://apps.who.int/iris/handle/10665/274351>. Accessed May 2, 2019.
11. World Health Organization. *Report of second Global School-based Student Health Survey in Myanmar 2016*. <http://www.who.int/iris/handle/10665/274350>. Accessed May 2, 2019.

- 1  
2  
3  
4  
5  
6  
7  
8  
9  
10  
11  
12  
13  
14  
15  
16  
17  
18  
19  
20  
21  
22  
23  
24  
25  
26  
27  
28  
29  
30  
31  
32  
33  
34  
35  
36  
37  
38  
39  
40  
41  
42  
43  
44  
45  
46  
47  
48  
49  
50  
51  
52  
53  
54  
55  
56  
57  
58  
59  
60
12. Prabandari YS, Dewi A. How do Indonesian youth perceive cigarette advertising? A cross-sectional study among Indonesian high school students. *Glob Health Action*. 2016;9:30914. doi:10.3402/gha.v9.30914.
  13. Chido-Amajuoyi OG, Mantey DS, Clendennen SL, Pérez A. Association of tobacco advertising, promotion and sponsorship (TAPS) exposure and cigarette use among Nigerian adolescents: implications for current practices, products and policies. *BMJ Glob Health*. 2017;2(3):e000357.doi:10.1136/bmjgh-2017-000357.
  14. Braverman MT, Aaro LE. Adolescent smoking and exposure to tobacco marketing under a tobacco advertising ban: findings from 2 Norwegian national samples. *AmJ Public Health*. 2004;94(7):1230–1238.
  15. Soneji S, Ambrose BK, Lee W, Sargent J, Tanski S. Direct-to-consumer tobacco marketing and its association with tobacco use among adolescents and young adults. *J Adolesc Health*. 2014;55(2):209–215. doi:10.1016/j.jadohealth.2014.01.019.
  16. Ministry of Health. *The control of smoking and consumption of Tobacco Product Law*. <https://seatca.org/dmdocuments/Myanmar%20-%20TC%20Law.pdf>. Accessed May 17, 2019.
  17. Gilmore AB, Fooks G, Drope J, Bialous SA, Jackson RR. Exposing and addressing tobacco industry conduct in low-income and middle-income countries. *Lancet* 2015;385(9972):1029–1043. doi:10.1016/S0140-6736(15)60312-9.
  18. Gostin LO. FDA regulation of tobacco: politics, law, and the public's health. *JAMA*. 2009;302(13):1459-1460. doi:10.1001/jama.2009.1421.
  19. Jamison N, Tynan M, MacNeil A, *et al*. Federal and state cigarette excise taxes - United States, 1995-2009. *MMWR Morb Mortal Wkly Rep*. 2009;58(19):524–527.
  20. Chaloupka FJ, Yurekli A, Fong GT. Tobacco Taxes as a tobacco control strategy. *Tob Control* 2012;21(2):172–180.doi:10.1136/tobaccocontrol-2011-050417.
  21. Latt NN, Saw YM, Myat Cho S, Kariya T, Yamamoto E, Hamajima N. Tobacco Control Law awareness, enforcement, and compliance among high school students in Myanmar. *Nagoya J Med Sci*. 2018;80(3):379–389. doi:10.18999/nagjms.80.3.379.
  22. Myint MNT, Yamamoto E, Ko MH, Khaing M, Reyer JA, Hamajima N. Knowledge, attitude, and usage pattern of tobacco among high school students in Nay Pyi Taw, Myanmar. *Nagoya J Med Sci*. 2019;81(1):65–79. doi:10.18999/nagjms.81.1.65.
  23. Akl EA, Jawad M, Lam WY, Co CN, Obeid R, Irani J. Motives, beliefs and attitudes towards waterpipe tobacco smoking: a systematic review. *Harm Reduct J*. 2013;10:12. doi:10.1186/1477-7517-10-12.
  24. Kyaing NN, Sein T, Sein AA, Htike MMT, Tun A, Shein NN. Smokeless tobacco use in Myanmar. *Indian J Cancer*. 2012; 49(4): 347–351.doi: 10.4103/0019-509X.107727.

- 1  
2  
3  
4  
5  
6  
7  
8  
9  
10  
11  
12  
13  
14  
15  
16  
17  
18  
19  
20  
21  
22  
23  
24  
25  
26  
27  
28  
29  
30  
31  
32  
33  
34  
35  
36  
37  
38  
39  
40  
41  
42  
43  
44  
45  
46  
47  
48  
49  
50  
51  
52  
53  
54  
55  
56  
57  
58  
59  
60
25. Morgenstern M, Sargent JD, Isensee B, Hanewinkel R. From never to daily smoking in 30 months: the predictive value of tobacco and nontobacco advertising exposure. *BMJ Open*. 2013;3(6): e002907. doi: <http://dx.doi.org/10.1136/bmjopen-2013-002907>.
26. World Health Organization. *Global School-based Student Health Survey*. <https://www.who.int/ncds/surveillance/gshs/factsheets/en>. Accessed May 16, 2019.
27. Sinha D N, Palipudi K M, Jones C K, et al. Levels and trends of smokeless tobacco use among youth in countries of the World Health Organization South-East Asia Region. *Indian J Cancer*. 2014;51(5):50-53. doi:10.4103/0019-509X.147472.
28. Wiener RC. Association of smokeless tobacco use and smoking in adolescents in the United States: an analysis of data from the Youth Risk Behavior Surveillance System survey, 2011. *J Am Dent Assoc*. 2013;144(8):930–938.
29. National Cancer Institute and Centers for Disease Control and Prevention. *Smokeless Tobacco and Public Health: A Global Perspective*. <https://cancercontrol.cancer.gov/brp/tcrb/global-perspective>. Accessed May 19, 2019.
30. Southeast Asia Tobacco Control Alliance. *The Tobacco Control Atlas: ASEAN Region, Fourth Edition*. <https://seatca.org/dmdocuments/Tobacco%20Control%20Atlas%20ASEAN%20Region%204th%20Ed%20Feb%202019.pdf>. Accessed May 19, 2019.
31. Sinha DN, Bhartiya D, Kumar A, Singh H, Mehrotra R. Men in Myanmar Submerged in Tobacco: Women Following. *Nicotine Tob Res*. 2017;19(11):1397-1398. doi:10.1093/ntr/ntw314

1  
2  
3 **Table List**  
4

5 **Table 1** Characteristics of study participants  
6

7  
8 **Table 2** Different kinds of TAPS <sup>a)</sup> exposures among study participants  
9

10 **Table 3** Illicit tobacco sale exposures among study participants  
11

12 **Table 4** Odds ratio (OR) and 95% confidence interval (CI) of current smoking and smokeless  
13 tobacco use among study participants  
14  
15  
16  
17  
18  
19  
20  
21  
22  
23  
24  
25  
26  
27  
28  
29  
30  
31  
32  
33  
34  
35  
36  
37  
38  
39  
40  
41  
42  
43  
44  
45  
46  
47  
48  
49  
50  
51  
52  
53  
54  
55  
56  
57  
58  
59  
60

For peer review only

## TABLES

**Table 1** Characteristics of study participants (N=1,174)

| Characteristics                                                               | Male<br>(N=482) |      | Female<br>(N=692) |      | Total<br>(N=1,174) |      |
|-------------------------------------------------------------------------------|-----------------|------|-------------------|------|--------------------|------|
|                                                                               | N               | %    | N                 | %    | N                  | %    |
| <b>Age</b>                                                                    |                 |      |                   |      |                    |      |
| ≤14 years                                                                     | 195             | 40.5 | 307               | 44.4 | 502                | 42.8 |
| 15 years                                                                      | 199             | 41.3 | 293               | 42.3 | 492                | 41.9 |
| 16 years                                                                      | 61              | 12.7 | 91                | 13.2 | 152                | 12.9 |
| 17 years                                                                      | 21              | 4.4  | 1                 | 0.1  | 22                 | 1.9  |
| ≥18 years                                                                     | 6               | 1.2  | 0                 | 0.0  | 6                  | 0.5  |
| <b>Grade</b>                                                                  |                 |      |                   |      |                    |      |
| 10                                                                            | 330             | 68.5 | 464               | 67.1 | 794                | 67.6 |
| 11                                                                            | 152             | 31.5 | 228               | 32.9 | 380                | 32.4 |
| <b>Current smoking and smokeless tobacco use</b>                              |                 |      |                   |      |                    |      |
| No                                                                            | 360             | 74.7 | 683               | 98.7 | 1,043              | 88.8 |
| Yes                                                                           | 122             | 25.3 | 9                 | 1.3  | 131                | 11.2 |
| <b>Parent smoking</b>                                                         |                 |      |                   |      |                    |      |
| No                                                                            | 453             | 94.0 | 662               | 95.7 | 1,115              | 95.0 |
| Yes                                                                           | 29              | 6.0  | 30                | 4.3  | 59                 | 5.0  |
| <b>Sibling smoking</b>                                                        |                 |      |                   |      |                    |      |
| No                                                                            | 427             | 88.6 | 652               | 94.2 | 1,079              | 91.9 |
| Yes                                                                           | 55              | 11.4 | 40                | 5.8  | 95                 | 8.1  |
| <b>Peer smoking</b>                                                           |                 |      |                   |      |                    |      |
| No                                                                            | 437             | 90.7 | 641               | 92.6 | 1,078              | 91.8 |
| Yes                                                                           | 45              | 9.3  | 51                | 7.4  | 96                 | 8.2  |
| <b>Ever received health education about smoking and smokeless tobacco use</b> |                 |      |                   |      |                    |      |
| No                                                                            | 228             | 47.3 | 235               | 34.0 | 463                | 39.4 |
| Yes                                                                           | 254             | 52.7 | 457               | 66.0 | 711                | 60.6 |
| <b>Perception of smoking and smokeless tobacco products</b>                   |                 |      |                   |      |                    |      |
| ≤7                                                                            | 151             | 31.3 | 116               | 16.8 | 267                | 22.7 |
| >7                                                                            | 331             | 68.7 | 576               | 83.2 | 907                | 77.3 |

**Table 2** Different kinds of TAPS <sup>a)</sup> exposures among study participants (N=1,174)

| TAPS <sup>a)</sup>                                                                                                                                                                          | Use <sup>b)</sup><br>(N=131) |      | No use <sup>c)</sup><br>(N=1,043) |      | Total<br>(N=1,174) |      |
|---------------------------------------------------------------------------------------------------------------------------------------------------------------------------------------------|------------------------------|------|-----------------------------------|------|--------------------|------|
|                                                                                                                                                                                             | N                            | %    | N                                 | %    | N                  | %    |
| <b>Ever seen or heard tobacco advertising and sponsorship in any form **</b>                                                                                                                |                              |      |                                   |      |                    |      |
| No                                                                                                                                                                                          | 25                           | 19.1 | 307                               | 29.4 | 332                | 28.3 |
| Yes                                                                                                                                                                                         | 106                          | 80.9 | 736                               | 70.6 | 842                | 71.7 |
| <b>Ever seen tobacco advertising signboards (vinyl, LED, stickers, etc.)</b>                                                                                                                |                              |      |                                   |      |                    |      |
| No                                                                                                                                                                                          | 128                          | 97.7 | 994                               | 95.3 | 1,122              | 52.0 |
| Yes                                                                                                                                                                                         | 3                            | 2.3  | 49                                | 4.7  | 52                 | 4.4  |
| <b>Ever seen tobacco advertising drawing or painting (on vehicles, on walls, on boards, etc.)</b>                                                                                           |                              |      |                                   |      |                    |      |
| No                                                                                                                                                                                          | 118                          | 90.1 | 925                               | 88.7 | 1,043              | 88.8 |
| Yes                                                                                                                                                                                         | 13                           | 9.9  | 118                               | 11.3 | 131                | 11.2 |
| <b>Ever seen tobacco advertising in journals, magazines, newspapers, and pamphlets</b>                                                                                                      |                              |      |                                   |      |                    |      |
| No                                                                                                                                                                                          | 125                          | 95.4 | 998                               | 95.7 | 1,123              | 95.7 |
| Yes                                                                                                                                                                                         | 6                            | 4.6  | 45                                | 4.3  | 51                 | 4.3  |
| <b>Ever seen broadcasting of tobacco advertisements (TV, radio, internet, social network like Facebook, etc.)</b>                                                                           |                              |      |                                   |      |                    |      |
| No                                                                                                                                                                                          | 120                          | 91.6 | 982                               | 94.2 | 1,102              | 93.9 |
| Yes                                                                                                                                                                                         | 11                           | 8.4  | 61                                | 5.8  | 72                 | 6.1  |
| <b>Ever seen or heard about the distribution of tobacco products free of charge or as gifts</b>                                                                                             |                              |      |                                   |      |                    |      |
| No                                                                                                                                                                                          | 124                          | 94.7 | 953                               | 91.4 | 1,077              | 91.7 |
| Yes                                                                                                                                                                                         | 7                            | 5.3  | 90                                | 8.6  | 97                 | 8.3  |
| <b>Ever seen or heard distributions of personal goods with tobacco product labels free of charge or as gifts ***</b>                                                                        |                              |      |                                   |      |                    |      |
| No                                                                                                                                                                                          | 64                           | 48.9 | 702                               | 67.3 | 766                | 65.2 |
| Yes                                                                                                                                                                                         | 67                           | 51.1 | 341                               | 32.7 | 408                | 34.8 |
| <b>Ever seen or heard about tobacco advertising with lucky draw, exchange of old cigarette pack with new ones, bonus to sellers, car stickers, etc. *</b>                                   |                              |      |                                   |      |                    |      |
| No                                                                                                                                                                                          | 125                          | 95.4 | 1,025                             | 98.3 | 1,150              | 98.0 |
| Yes                                                                                                                                                                                         | 6                            | 4.6  | 18                                | 1.7  | 24                 | 2.0  |
| <b>Ever seen any goods with the label of a cigar or tobacco products being used in promotions (clothes, hats, lighters, key chains, tissue boxes, stationeries, kitchen utensils, etc.)</b> |                              |      |                                   |      |                    |      |
| No                                                                                                                                                                                          | 34                           | 26.0 | 340                               | 32.6 | 703                | 67.4 |

28

|                                                                                                                                                    |     |      |       |      |       |      |
|----------------------------------------------------------------------------------------------------------------------------------------------------|-----|------|-------|------|-------|------|
| Yes                                                                                                                                                | 374 | 31.9 | 97    | 74.0 | 800   | 68.1 |
| <b>Ever seen any toy, comestible or wares made in the form of a cigar (toys, chewing gums, sweet sticks, key chains, lighters, balloons, etc.)</b> |     |      |       |      |       |      |
| No                                                                                                                                                 | 88  | 67.2 | 702   | 67.3 | 790   | 67.3 |
| Yes                                                                                                                                                | 43  | 32.8 | 341   | 32.7 | 384   | 32.7 |
| <b>Ever heard about the announcements of tobacco advertisement at fairs and festivals *</b>                                                        |     |      |       |      |       |      |
| No                                                                                                                                                 | 128 | 97.7 | 1,040 | 99.7 | 1,168 | 99.5 |
| Yes                                                                                                                                                | 3   | 2.3  | 3     | 0.3  | 6     | 0.5  |
| <b>Ever seen or heard about the tobacco advertising as sponsorship or support to sports, funfairs, exhibitions, or any social activities **</b>    |     |      |       |      |       |      |
| No                                                                                                                                                 | 70  | 53.4 | 689   | 66.1 | 759   | 64.7 |
| Yes                                                                                                                                                | 61  | 46.6 | 354   | 33.9 | 415   | 35.3 |
| <b>Exposure to any kind of TAPS <sup>a)</sup></b>                                                                                                  |     |      |       |      |       |      |
| No                                                                                                                                                 | 8   | 6.1  | 99    | 9.5  | 107   | 9.1  |
| Yes                                                                                                                                                | 123 | 93.9 | 944   | 90.5 | 1,067 | 90.9 |

\*p<0.05, \*\*p<0.01, \*\*\*p<0.001; <sup>a)</sup>Tobacco advertisement, promotion, and sponsorship, <sup>b)</sup>Current smoking and smokeless tobacco use, <sup>c)</sup>No current smoking and smokeless



**Table 3** Illicit tobacco sale exposures among study participants (N=1,174)

| Illicit tobacco sale                                                                                         | Use <sup>b)</sup> |      | No use <sup>c)</sup> |      | Total     |      |
|--------------------------------------------------------------------------------------------------------------|-------------------|------|----------------------|------|-----------|------|
|                                                                                                              | (N=131)           |      | (N=1,043)            |      | (N=1,174) |      |
|                                                                                                              | N                 | %    | N                    | %    | N         | %    |
| <b>Had seen selling cigars inside or within 100 feet of the school premises within the last 12 months **</b> |                   |      |                      |      |           |      |
| No                                                                                                           | 92                | 19.1 | 93                   | 13.4 | 185       | 15.8 |
| Yes                                                                                                          | 390               | 80.9 | 599                  | 86.6 | 989       | 84.2 |
| <b>Had seen selling or giving cigars to minors <sup>a)</sup> within the last 12 months ***</b>               |                   |      |                      |      |           |      |
| No                                                                                                           | 86                | 17.8 | 120                  | 17.3 | 206       | 17.5 |
| Yes                                                                                                          | 396               | 82.2 | 572                  | 82.7 | 968       | 82.5 |
| <b>Had seen selling or distributing cigars by minors <sup>a)</sup> within the last 12 months **</b>          |                   |      |                      |      |           |      |
| No                                                                                                           | 209               | 43.4 | 312                  | 45.1 | 521       | 44.4 |
| Yes                                                                                                          | 273               | 56.6 | 380                  | 54.9 | 653       | 55.6 |
| <b>Had seen selling cigarettes singly or in packs less than 20 cigarettes within the last 12 months ***</b>  |                   |      |                      |      |           |      |
| No                                                                                                           | 50                | 10.4 | 108                  | 15.6 | 158       | 13.5 |
| Yes                                                                                                          | 432               | 89.6 | 584                  | 84.4 | 1,016     | 86.5 |

\*p<0.05, \*\*p<0.01, \*\*\*p<0.001; <sup>a)</sup>Under 18 years old

**Table 4** Odds ratio (OR) and 95% confidence interval (CI) of current smoking and smokeless tobacco use among study participants (N=1,174)

| Characteristics                                   | Use <sup>a)</sup> | No use <sup>b)</sup> | Unadjusted |                  | Adjusted <sup>c)</sup> |                  |
|---------------------------------------------------|-------------------|----------------------|------------|------------------|------------------------|------------------|
|                                                   | (N=131)           | (N=1043)             | OR         | 95% CI           | OR                     | 95% CI           |
|                                                   | N (%)             | N (%)                |            |                  |                        |                  |
| <b>Age</b>                                        |                   |                      |            |                  |                        |                  |
| ≤ 14 years                                        | 14 (10.7)         | 488 (46.8)           | 1          | Reference        | 1                      | Reference        |
| > 14 years                                        | 117 (89.3)        | 555 (53.2)           | 7.35       | (4.17-12.96)***  | 9.81                   | (4.54-21.19)***  |
| <b>Gender</b>                                     |                   |                      |            |                  |                        |                  |
| Female                                            | 9 (6.9)           | 683 (65.5)           | 1          | Reference        | 1                      | Reference        |
| Male                                              | 122 (93.1)        | 360 (34.5)           | 25.72      | (12.91-51.22)*** | 28.06                  | (13.29-59.25)*** |
| <b>Grade</b>                                      |                   |                      |            |                  |                        |                  |
| 10                                                | 56 (42.7)         | 738 (70.8)           | 1          | Reference        | 1                      | Reference        |
| 11                                                | 75 (57.3)         | 305 (29.2)           | 3.24       | (2.24-4.70)***   | 1.52                   | (0.85-2.73)      |
| <b>Parent smoking</b>                             |                   |                      |            |                  |                        |                  |
| No                                                | 128 (97.7)        | 987 (94.6)           | 1          | Reference        | 1                      | Reference        |
| Yes                                               | 3 (2.3)           | 56 (5.4)             | 0.41       | (0.13-1.34)      | 0.31                   | (0.08-1.29)      |
| <b>Sibling smoking</b>                            |                   |                      |            |                  |                        |                  |
| No                                                | 118 (90.1)        | 961 (92.1)           | 1          | Reference        | 1                      | Reference        |
| Yes                                               | 13 (9.9)          | 82 (7.9)             | 1.29       | (0.70-2.39)      | 1.06                   | (0.47-2.37)      |
| <b>Peer smoking</b>                               |                   |                      |            |                  |                        |                  |
| No                                                | 119 (90.8)        | 959 (91.9)           | 1          | Reference        | 1                      | Reference        |
| Yes                                               | 12 (9.2)          | 84 (8.1)             | 1.15       | (0.61-2.17)      | 0.41                   | (0.17-0.95)      |
| <b>Exposure to any kind of TAPS <sup>a)</sup></b> |                   |                      |            |                  |                        |                  |

|     |            |            |      |             |      |                 |
|-----|------------|------------|------|-------------|------|-----------------|
| No  | 89 (6.1)   | 99 (9.5)   | 1    | Reference   | 1    | Reference       |
| Yes | 123 (93.9) | 944 (90.5) | 1.61 | (0.77-3.40) | 6.59 | (2.33-18.64)*** |

#### Had seen selling cigars inside or within 100 feet of the school premise within the last 12 months

|     |            |            |      |               |      |                |
|-----|------------|------------|------|---------------|------|----------------|
| No  | 9 (6.9)    | 176 (16.9) | 1    | Reference     | 1    | Reference      |
| Yes | 122 (93.1) | 867 (83.1) | 2.75 | (1.37-5.52)** | 4.17 | (1.65-10.58)** |

#### Had seen selling or giving cigars to minors <sup>a)</sup> within the last 12 months

|     |            |            |      |                 |      |                 |
|-----|------------|------------|------|-----------------|------|-----------------|
| No  | 4 (3.1)    | 202 (19.4) | 1    | Reference       | 1    | Reference       |
| Yes | 127 (96.9) | 841 (80.6) | 7.63 | (2.79-20.88)*** | 6.46 | (2.18-19.12)*** |

#### Had seen selling or distributing cigars by minors <sup>a)</sup> more than once within the last 12 months

|     |           |            |      |               |      |                |
|-----|-----------|------------|------|---------------|------|----------------|
| No  | 44 (33.6) | 477 (45.7) | 1    | Reference     | 1    | Reference      |
| Yes | 87 (66.4) | 566 (54.3) | 1.67 | (1.14-2.44)** | 2.42 | (1.42-4.10)*** |

#### Had seen selling cigarettes singly or in packs less than 20 cigarettes within the last 12 months

|     |            |            |      |                 |      |              |
|-----|------------|------------|------|-----------------|------|--------------|
| No  | 3 (2.3)    | 155 (14.9) | 1    | Reference       | 1    | Reference    |
| Yes | 128 (97.7) | 888 (85.1) | 7.45 | (2.34-23.70)*** | 3.32 | (0.93-11.85) |

#### Ever received health education about smoking and smokeless tobacco use

|     |           |            |      |                |      |               |
|-----|-----------|------------|------|----------------|------|---------------|
| No  | 70 (53.4) | 393 (37.7) | 1    | Reference      | 1    | Reference     |
| Yes | 61 (46.6) | 650 (62.3) | 0.53 | (0.37-0.76)*** | 0.45 | (0.27-0.78)** |

#### Perception of smoking and smokeless tobacco products

|     |           |            |      |               |      |                |
|-----|-----------|------------|------|---------------|------|----------------|
| ≤ 7 | 80 (61.1) | 187 (17.9) | 1    | Reference     | 1    | Reference      |
| >7  | 51 (38.9) | 856 (82.1) | 0.14 | 0.10-0.21)*** | 0.17 | (0.10-0.30)*** |

\*p<0.05, \*\*p<0.01, \*\*\*p<0.001; <sup>a)</sup>Current smoking and smokeless tobacco use, <sup>b)</sup>No current smoking and smokeless

tobacco use, <sup>c)</sup>Adjusted for the variables listed in the table, <sup>d)</sup>Under 18 years old

**STROBE 2007 (v4) Statement—Checklist of items that should be included in reports of cross-sectional studies**

| Section/Topic             | Item # | Recommendation                                                                                                                           | Reported on page # |
|---------------------------|--------|------------------------------------------------------------------------------------------------------------------------------------------|--------------------|
| <b>Title and abstract</b> | 1      | (a) Indicate the study's design with a commonly used term in the title or the abstract                                                   | 1-2                |
|                           |        | (b) Provide in the abstract an informative and balanced summary of what was done and what was found                                      | 2-4                |
| <b>Introduction</b>       |        |                                                                                                                                          |                    |
| Background/rationale      | 2      | Explain the scientific background and rationale for the investigation being reported                                                     | 5-7                |
| Objectives                | 3      | State specific objectives, including any prespecified hypotheses                                                                         | 7-8                |
| <b>Methods</b>            |        |                                                                                                                                          |                    |
| Study design              | 4      | Present key elements of study design early in the paper                                                                                  | 8                  |
| Setting                   | 5      | Describe the setting, locations, and relevant dates, including periods of recruitment, exposure, follow-up, and data collection          | 8-9                |
| Participants              | 6      | (a) Give the eligibility criteria, and the sources and methods of selection of participants                                              | 8-9                |
| Variables                 | 7      | Clearly define all outcomes, exposures, predictors, potential confounders, and effect modifiers. Give diagnostic criteria, if applicable | 9-10               |

|                              |     |                                                                                                                                                                                                   |      |
|------------------------------|-----|---------------------------------------------------------------------------------------------------------------------------------------------------------------------------------------------------|------|
| Data sources/<br>measurement | 8*  | For each variable of interest, give sources of data and details of methods of assessment (measurement). Describe comparability of assessment methods if there is more than one group              | -    |
| Bias                         | 9   | Describe any efforts to address potential sources of bias                                                                                                                                         | -    |
| Study size                   | 10  | Explain how the study size was arrived at                                                                                                                                                         | 8    |
| Quantitative variables       | 11  | Explain how quantitative variables were handled in the analyses. If applicable, describe which groupings were chosen and why                                                                      | 9-11 |
| Statistical methods          | 12  | (a) Describe all statistical methods, including those used to control for confounding                                                                                                             | -    |
|                              |     | (b) Describe any methods used to examine subgroups and interactions                                                                                                                               | -    |
|                              |     | (c) Explain how missing data were addressed                                                                                                                                                       | 8    |
|                              |     | (d) If applicable, describe analytical methods taking account of sampling strategy                                                                                                                | -    |
|                              |     | (e) Describe any sensitivity analyses                                                                                                                                                             | -    |
| <b>Results</b>               |     |                                                                                                                                                                                                   |      |
| Participants                 | 13* | (a) Report numbers of individuals at each stage of study—eg numbers potentially eligible, examined for eligibility, confirmed eligible, included in the study, completing follow-up, and analysed | -    |

|                   |     |                                                                                                                                                                                                              |                             |
|-------------------|-----|--------------------------------------------------------------------------------------------------------------------------------------------------------------------------------------------------------------|-----------------------------|
|                   |     | (b) Give reasons for non-participation at each stage                                                                                                                                                         | -                           |
|                   |     | (c) Consider use of a flow diagram                                                                                                                                                                           | -                           |
| Descriptive data  | 14* | (a) Give characteristics of study participants (eg demographic, clinical, social) and information on exposures and potential confounders                                                                     | 11<br>Table 1               |
|                   |     | (b) Indicate number of participants with missing data for each variable of interest                                                                                                                          | -                           |
| Outcome data      | 15* | Report numbers of outcome events or summary measures                                                                                                                                                         | 11-13<br>Table 2<br>Table 3 |
| Main results      | 16  | (a) Give unadjusted estimates and, if applicable, confounder-adjusted estimates and their precision (eg, 95% confidence interval). Make clear which confounders were adjusted for and why they were included | 12-13<br>Table 4            |
|                   |     | (b) Report category boundaries when continuous variables were categorized                                                                                                                                    | -                           |
|                   |     | (c) If relevant, consider translating estimates of relative risk into absolute risk for a meaningful time period                                                                                             | -                           |
| Other analyses    | 17  | Report other analyses done—eg analyses of subgroups and interactions, and sensitivity analyses                                                                                                               | -                           |
| <b>Discussion</b> |     |                                                                                                                                                                                                              |                             |
| Key results       | 18  | Summarise key results with reference to study objectives                                                                                                                                                     | 13                          |

|                          |    |                                                                                                                                                                            |       |
|--------------------------|----|----------------------------------------------------------------------------------------------------------------------------------------------------------------------------|-------|
| Limitations              | 19 | Discuss limitations of the study, taking into account sources of potential bias or imprecision. Discuss both direction and magnitude of any potential bias                 | 20    |
| Interpretation           | 20 | Give a cautious overall interpretation of results considering objectives, limitations, multiplicity of analyses, results from similar studies, and other relevant evidence | 13-21 |
| Generalisability         | 21 | Discuss the generalisability (external validity) of the study results                                                                                                      | 20    |
| <b>Other information</b> |    |                                                                                                                                                                            |       |
| Funding                  | 22 | Give the source of funding and the role of the funders for the present study and, if applicable, for the original study on which the present article is based              | 22    |

\*Give information separately for cases and controls in case-control studies and, if applicable, for exposed and unexposed groups in cohort and cross-sectional studies.

**Note:** An Explanation and Elaboration article discusses each checklist item and gives methodological background and published examples of transparent reporting. The STROBE checklist is best used in conjunction with this article (freely available on the Web sites of PLoS Medicine at <http://www.plosmedicine.org/>, Annals of Internal Medicine at <http://www.annals.org/>, and Epidemiology at <http://www.epidem.com/>). Information on the STROBE Initiative is available at [www.strobe-statement.org](http://www.strobe-statement.org).

# BMJ Open

## A cross-sectional study on tobacco advertising, promotion and sponsorship (TAPS) and violations of tobacco sale regulations in Myanmar: Do these factors affect current tobacco use among Myanmar high school students?

|                                 |                                                                                                                                                                                                                                                                                                                                                                                                                                                                                                                                                                                                                                                                                                                                                                                                                                                                                                                                                                                                                                                                                                                                                       |
|---------------------------------|-------------------------------------------------------------------------------------------------------------------------------------------------------------------------------------------------------------------------------------------------------------------------------------------------------------------------------------------------------------------------------------------------------------------------------------------------------------------------------------------------------------------------------------------------------------------------------------------------------------------------------------------------------------------------------------------------------------------------------------------------------------------------------------------------------------------------------------------------------------------------------------------------------------------------------------------------------------------------------------------------------------------------------------------------------------------------------------------------------------------------------------------------------|
| Journal:                        | <i>BMJ Open</i>                                                                                                                                                                                                                                                                                                                                                                                                                                                                                                                                                                                                                                                                                                                                                                                                                                                                                                                                                                                                                                                                                                                                       |
| Manuscript ID                   | bmjopen-2019-031933.R1                                                                                                                                                                                                                                                                                                                                                                                                                                                                                                                                                                                                                                                                                                                                                                                                                                                                                                                                                                                                                                                                                                                                |
| Article Type:                   | Original research                                                                                                                                                                                                                                                                                                                                                                                                                                                                                                                                                                                                                                                                                                                                                                                                                                                                                                                                                                                                                                                                                                                                     |
| Date Submitted by the Author:   | 03-Dec-2019                                                                                                                                                                                                                                                                                                                                                                                                                                                                                                                                                                                                                                                                                                                                                                                                                                                                                                                                                                                                                                                                                                                                           |
| Complete List of Authors:       | <p>Cho, Su Myat; Nagoya University Graduate School of Medicine Faculty of Medicine, Dept. of Healthcare Administration<br/>           Saw, Yu Mon; The University of Tokyo, Dept. of Community and Global Health, the Graduate School of Medicine<br/>           Latt, Nyi Nyi; Aung Myin Myint Mo Hospital, Gyobingauk<br/>           Saw, Thu Nandar; The University of Tokyo, Dept. of Community and Global Health<br/>           Htet, Hein; Nagoya Daigaku, Health Care Administration;<br/>           Khaing , Moe; Myanmar Ministry of Health and Sports<br/>           Than, Thet Mon; Myanmar Ministry of Health and Sports<br/>           Win, Ei Mon; Myanmar Ministry of Health and Sports<br/>           Aung , Zaw Zaw; Myanmar Ministry of Health and Sports<br/>           Kariya, Tetsuyoshi; Nagoya University Graduate School of Medicine Faculty of Medicine, Dept. of Healthcare Administration<br/>           Yamamoto, Eiko; Nagoya University Graduate School of Medicine Faculty of Medicine, Dept. of Healthcare Administration<br/>           Hamajima, Nobuyuki; Nagoya Univ, Department of Healthcare Administration</p> |
| <b>Primary Subject Heading</b>: | Global health                                                                                                                                                                                                                                                                                                                                                                                                                                                                                                                                                                                                                                                                                                                                                                                                                                                                                                                                                                                                                                                                                                                                         |
| Secondary Subject Heading:      | Public health, Smoking and tobacco                                                                                                                                                                                                                                                                                                                                                                                                                                                                                                                                                                                                                                                                                                                                                                                                                                                                                                                                                                                                                                                                                                                    |
| Keywords:                       | Tobacco advertising, tobacco sale, high school students, Myanmar                                                                                                                                                                                                                                                                                                                                                                                                                                                                                                                                                                                                                                                                                                                                                                                                                                                                                                                                                                                                                                                                                      |
|                                 |                                                                                                                                                                                                                                                                                                                                                                                                                                                                                                                                                                                                                                                                                                                                                                                                                                                                                                                                                                                                                                                                                                                                                       |

SCHOLARONE™  
Manuscripts





I, the Submitting Author has the right to grant and does grant on behalf of all authors of the Work (as defined in the below author licence), an exclusive licence and/or a non-exclusive licence for contributions from authors who are: i) UK Crown employees; ii) where BMJ has agreed a CC-BY licence shall apply, and/or iii) in accordance with the terms applicable for US Federal Government officers or employees acting as part of their official duties; on a worldwide, perpetual, irrevocable, royalty-free basis to BMJ Publishing Group Ltd ("BMJ") its licensees and where the relevant Journal is co-owned by BMJ to the co-owners of the Journal, to publish the Work in this journal and any other BMJ products and to exploit all rights, as set out in our [licence](#).

The Submitting Author accepts and understands that any supply made under these terms is made by BMJ to the Submitting Author unless you are acting as an employee on behalf of your employer or a postgraduate student of an affiliated institution which is paying any applicable article publishing charge ("APC") for Open Access articles. Where the Submitting Author wishes to make the Work available on an Open Access basis (and intends to pay the relevant APC), the terms of reuse of such Open Access shall be governed by a Creative Commons licence – details of these licences and which [Creative Commons](#) licence will apply to this Work are set out in our licence referred to above.

Other than as permitted in any relevant BMJ Author's Self Archiving Policies, I confirm this Work has not been accepted for publication elsewhere, is not being considered for publication elsewhere and does not duplicate material already published. I confirm all authors consent to publication of this Work and authorise the granting of this licence.

1  
2  
3  
4  
5  
6  
7  
8  
9  
10  
11  
12  
13  
14  
15  
16  
17  
18  
19  
20  
21  
22  
23  
24  
25  
26  
27  
28  
29  
30  
31  
32  
33  
34  
35  
36  
37  
38  
39  
40  
41  
42  
43  
44  
45  
46  
47  
48  
49  
50  
51  
52  
53  
54  
55  
56  
57  
58  
59  
60

1 **A cross-sectional study on tobacco advertising, promotion and sponsorship (TAPS) and**  
2 **violations of tobacco sale regulations in Myanmar: Do these factors affect current**  
3 **tobacco use among Myanmar high school students?**

4  
5 Su Myat Cho<sup>1</sup>, Yu Mon Saw<sup>1,2</sup>, NyiNyi Latt<sup>3</sup>, Thu Nandar Saw<sup>4</sup>, Hein Htet<sup>5</sup>, Moe Khaing<sup>1,6</sup>,  
6 Thet Mon Than<sup>6</sup>, Ei Mon Win<sup>7</sup>, ZawZaw Aung<sup>7</sup>, Tetsuyoshi Kariya<sup>1,2</sup>, Eiko Yamamoto<sup>1</sup>,  
7 Nobuyuki Hamajima<sup>1</sup>

8  
9 *<sup>1</sup>Department of Healthcare Administration, Nagoya University Graduate School of Medicine,*  
10 *Nagoya, Japan*

11 *<sup>2</sup>Nagoya University Asian Satellite Campuses Institute, Nagoya, Japan*

12 *<sup>3</sup>AungMyinMyint Mo Hospital, Gyobingauk, Myanmar*

13 *<sup>4</sup>Department of Community and Global Health, Graduate School of Medicine, The University*  
14 *of Tokyo, Tokyo, Japan*

15 *<sup>5</sup>Department of Preventive and Social Medicine, University of Medicine, Mandalay, Myanmar*

16 *<sup>6</sup>Department of Medical Services, Ministry of Health and Sports, NayPyi Taw, Myanmar*

17 *<sup>7</sup>Department of Public Health, Ministry of Health and Sports, NayPyi Taw, Myanmar*

18  
19  
20  
21 Corresponding author:

22 Yu Mon Saw

23 Department of Healthcare Administration, Nagoya University Graduate School of Medicine,  
24 65 Tsurumai-cho, Showa-ku, Nagoya 466-8550, Japan

25 E-mail address: [sawyumon@med.nagoya-u.ac.jp](mailto:sawyumon@med.nagoya-u.ac.jp)

26  
27 Word count- 4111

1  
2  
3 28 **ABSTRACT**

4 29 **Objectives:** To examine the associations of current tobacco use with tobacco advertising,  
5 30 promotion and sponsorship (TAPS), and illicit tobacco sales exposures among Myanmar high  
6 31 school students.  
7  
8

9  
10 32 **Design:** A quantitative, cross-sectional study.

11 33 **Setting:** Seven high schools from both urban and rural areas of four states and regions in  
12 34 Myanmar.

13 35 **Participants:** In total, 1,174 high school students (482 males and 692 females) were  
14 36 interviewed using a self-administered questionnaire.

15 37 **Main outcome measure:** Current tobacco use of participants, defined as using any kind of  
16 38 smoked or smokeless tobacco product at least one occasion within the past 30 days.

17 39 **Results:** The prevalence of TAPS exposure was 90.9% among high school students in  
18 40 Myanmar. Current tobacco use was positively associated with being over 14 years old (AOR  
19 41 9.81; 95%CI 4.54–21.19), being male (AOR 28.06; 95%CI 13.29–59.25), exposure to any  
20 42 kind of TAPS (AOR 6.59; 95%CI 2.33–18.64), having seen any smoked tobacco product for  
21 43 sale inside or within 100 feet of the school premises (AOR 4.17; 95%CI 1.65–10.58), having  
22 44 seen the sale or gifting of any smoked tobacco product to minors (AOR 6.40; 95%CI 2.18–  
23 45 19.12), and having seen the sale or distribution of any smoked tobacco product by minors  
24 46 (AOR 2.42; 95% CI 1.42–4.10). Having ever received health education about tobacco use  
25 47 (AOR 0.45; 95% CI 0.27–0.78), or having a higher perception score of tobacco use (AOR  
26 48 0.17; 95% CI 0.10–0.30) were negatively associated with current tobacco use.

27 49 **Conclusions:** There was an alarming prevalence of TAPS exposure among Myanmar high  
28 50 school students. TAPS exposure and violations of tobacco sale regulations were strong risk  
29 51 factors for current tobacco use among Myanmar high school students, while health education  
30 52 about tobacco products was reported as an effective protective factor. Specific smokeless  
31 53 tobacco sale regulations for minors are needed immediately in Myanmar.

32  
33  
34  
35  
36 54 Key words: Tobacco advertising, tobacco sale, current tobacco use, high school students,  
37 55 Myanmar  
38  
39  
40  
41  
42  
43  
44  
45  
46  
47  
48  
49  
50  
51  
52  
53  
54  
55  
56  
57  
58  
59  
60

## 56 **STRENGTHS AND LIMITATIONS OF THIS STUDY**

- 57     ▪ This study is the first in Myanmar to report the associations of current tobacco use with  
58     TAPS, and illicit tobacco sales exposures among high school students.
- 59     ▪ The findings of this study cannot be generalized for the whole nation. It was conducted  
60     among 1,174 students from two states and two regions out of a total of seven states, seven  
61     regions, and one territory in Myanmar.
- 62     ▪ This study could not confirm the causal relationships of current tobacco use among high  
63     school students because of the cross-sectional nature of our study.
- 64     ▪ Due to the limitations of the cross-sectional study design, this study calls for further  
65     TAPS-related interventional and longitudinal studies to explore Myanmar adolescents'  
66     tobacco use behaviours.

## 67 INTRODUCTION

68 “Tobacco use,” defined as the use of any type of smoked or smokeless tobacco,<sup>1)</sup> is regarded  
69 as an important public health concern worldwide. Globally, it was estimated that 24 million  
70 (7.0%) adolescents aged between 13 and 15 years had smoked cigarettes in the past 30 days  
71 and 13.4 million (3.6%) had used smokeless tobacco products in the past 30 days during  
72 2017.<sup>1)</sup> In the United States, it was reported that 4 million high school students were current  
73 tobacco users in 2018.<sup>2)</sup> In Southeast Asia, the prevalence of adolescents' tobacco use in the  
74 past 30 days was 5.7% and that of smokeless tobacco use was 7.2% over the period of 2007 to  
75 2017.<sup>1)</sup> A recent multi-national study reported that, between 2009 and 2013, adolescent  
76 smokeless tobacco use in the World Health Organization (WHO) South-East Asia Region  
77 (SEAR) was at its highest in Bhutan (23.2%), followed by Nepal (16.2%), Timor-Leste  
78 (14.2%), Myanmar (9.8%), India (9.0%), Sri Lanka (8.5%), the Maldives (6.2%), Bangladesh  
79 (5.9%), and Thailand (5.7%).<sup>3)</sup> Thus, Myanmar ranked the fourth-highest for adolescent  
80 smokeless tobacco use among these nine countries. Myanmar is one of the countries with high  
81 prevalence of tobacco use among young population in the WHO SEAR countries.<sup>4)</sup> Cigarette  
82 smoking among schoolchildren is much higher in Myanmar compared to other SEAR  
83 countries, i.e., Bangladesh, India, Maldives, Nepal, and Sri Lanka.<sup>5)</sup> The use of smokeless  
84 tobacco product is also highly prevalent in Myanmar as compared to other countries.<sup>6)</sup>

1  
2  
3  
4 85 Tobacco use is responsible for five million deaths every year globally, a figure that is  
5  
6  
7 86 expected to rise to 10 million per year by 2030.<sup>7)</sup> In 2004, it was estimated that 600,000  
8  
9  
10 87 people had died from the effects of second-hand smoke, accounting for roughly 1% of global  
11  
12  
13 88 mortality.<sup>8)</sup> Adolescents are highly vulnerable to addiction to the nicotine in tobacco. A recent  
14  
15  
16 89 study has shown that the earlier people become dependent on nicotine, the more likely they  
17  
18  
19 90 are to become addicted to smoking in adulthood.<sup>9)</sup> Moreover, nicotine consumption may  
20  
21  
22 91 negatively impact brain development during adolescence.<sup>10)</sup> Studies have shown that  
23  
24  
25 92 adolescent smoking is associated with poor academic performance<sup>11)</sup> and attention and  
26  
27  
28 93 cognitive deficits.<sup>12)</sup> Smokeless tobacco use is as dangerous as smoked forms of tobacco  
29  
30  
31 94 because it contains nicotine, carcinogens and other toxic chemicals.<sup>13)</sup> Smokeless tobacco use  
32  
33  
34 95 has deleterious effects to oral health including the staining and discolouration of teeth,  
35  
36  
37 96 leukoplakia, erythroplakia and oral cancer.<sup>14)</sup> A recent systematic review from India reported a  
38  
39  
40 97 positive association between smokeless tobacco use and various cancers (oral, oesophageal,  
41  
42  
43 98 pancreatic) in the South-East Asian Region and Eastern Mediterranean Region.<sup>15)</sup> Moreover,  
44  
45  
46 99 another recent systematic review in the United States found an increased risk of heart disease  
47  
48  
49 100 and stroke among smokeless tobacco users.<sup>16)</sup>  
50  
51

52  
53 101 Studies have shown that tobacco and smokeless tobacco use is highly prevalent  
54  
55  
56 102 among Myanmar high school students. Since 2001, the Global Youth Tobacco Survey  
57  
58  
59  
60

1  
2  
3  
4 103 (GYTS) has been conducted every 3 to 5 years in Myanmar to monitor tobacco use among  
5  
6  
7 104 high school students .The findings from the 2016 GYTS conducted among high school  
8  
9  
10 105 students pointed out that the prevalence of the current use of smoked tobacco products and the  
11  
12  
13 106 prevalence of the current use of smokeless tobacco products was 10.6% and 5.7  
14  
15  
16 107 respectively.<sup>17)</sup> In parallel with the GYTS, Myanmar has been conducting the nationwide  
17  
18  
19 108 Global School-based Student Health Survey (GSHS) to monitor the understanding of health  
20  
21  
22 109 risk behaviours among high school students. The 2016 survey also reported that the  
23  
24  
25 110 prevalence of current tobacco smoking and current smokeless tobacco use among high school  
26  
27  
28 111 students was 7.2% and 8.5%, respectively.<sup>18)</sup> Another study conducted among high school  
29  
30  
31 112 students in 2015 in Nay Pyi Taw, Myanmar, reported that 34.7% were smokers and 28.3%  
32  
33  
34 113 were smokeless tobacco users.<sup>19)</sup> Therefore, the use of smoked and smokeless tobacco among  
35  
36  
37 114 high school students in Myanmar is an important public health issue as well as a social one.  
38  
39  
40 115 Moreover, all these studies also pointed out that most high school students began using  
41  
42  
43 116 tobacco before the age of 14. However, in Myanmar, parents tend to show less concern about  
44  
45  
46 117 their children becoming smokeless tobacco users (especially chewing betel quid with tobacco)  
47  
48  
49 118 because there is a widespread misconception that the use of smokeless tobacco is not as  
50  
51  
52 119 harmful as the use of cigarettes.<sup>13)</sup> It is important to monitor the initiation and pattern of  
53  
54  
55 120 tobacco use among adolescents and youths, especially among high school students.  
56  
57  
58  
59  
60

1  
2  
3  
4 121 More than a decade ago, Myanmar signed the WHO Framework Convention on  
5  
6  
7 122 Tobacco Control (FCTC) and enacted the first Tobacco Control Law in 2006, regulating  
8  
9  
10 123 tobacco advertising, promotion, and sponsorship (TAPS) and tobacco sales to minors.<sup>17)</sup>  
11  
12  
13 124 Subsequently, the restrictions on smoking in all indoor public places, the introduction of  
14  
15  
16 125 graphic health warnings on tobacco product packaging, and the raising of tobacco product  
17  
18  
19 126 taxes were all promulgated. Despite this, the prevalence of current tobacco use among  
20  
21  
22 127 Myanmar high school students has not changed significantly over the past 15 years.<sup>17)</sup>  
23  
24  
25

26 128 A comparison of the 2007 and the 2016 GSHS also revealed that the prevalence of  
27  
28  
29 129 cigarette smoking among high school students had increased significantly, from 2.0% to  
30  
31  
32 130 6.7%.<sup>18)</sup> Although the Tobacco Control Law has banned tobacco sales to minors, adolescent  
33  
34  
35 131 smokers can still buy cigarettes from large stores, retail shops, or street vendors very easily.<sup>17)</sup>  
36  
37  
38 132 These alarming findings indicate the failure of efforts to control tobacco consumption among  
39  
40  
41 133 young people in Myanmar.  
42  
43  
44

45 134 Although the Tobacco Control Law in Myanmar prohibits TAPS activities by the  
46  
47  
48 135 tobacco industry, TAPS activities are still common. Most tobacco companies distribute  
49  
50  
51 136 tobacco products and personal goods with tobacco product labels either free of charge or as  
52  
53  
54 137 gifts. According to the 2016 Myanmar GYTS conducted among high school students, 8.7% of  
55  
56  
57 138 boys and 3.6% of girls reported that tobacco companies had offered free tobacco products,  
58  
59  
60



1  
2  
3  
4 139 and 7.3% of boys and 4.2% of girls reported owning something with tobacco branding or a  
5  
6  
7 140 tobacco logo.<sup>17)</sup> Furthermore, 83.4% of the students reported noticing someone using tobacco  
8  
9  
10 141 products on television or in videos and movies.<sup>17)</sup>

14 142 Researchers from other parts of the world have reported that TAPS exposure can  
15  
16  
17 143 affect adolescent smoking behaviours.<sup>20-23)</sup> A positive association between exposure to  
18  
19  
20 144 cigarette advertisements and initiating smoking has been reported among Indonesian  
21  
22  
23 145 students.<sup>20)</sup> A longitudinal study conducted in Germany also pointed out that, with every  
24  
25  
26 146 additional 10 tobacco advertisements, the adjusted relative risk for established smoking and  
27  
28  
29 147 daily smoking was raised by 38% and 30%, respectively.<sup>24)</sup> Adolescent students, in a phase of  
30  
31  
32 148 life where curiosity is at its peak, are vulnerable to adopting smoked or smokeless tobacco  
33  
34  
35 149 use.<sup>13, 25)</sup>

38  
39 150 At present, research in Myanmar is limited where concerns the patterns of high  
40  
41  
42 151 school students' tobacco use and their connection to TAPS exposure. Our previous study,<sup>26)</sup>  
43  
44  
45 152 conducted among the same participants, revealed the low awareness of the Tobacco Control  
46  
47  
48 153 Law among Myanmar high school students, but we did not examine how TAPS exposure and  
49  
50  
51 154 violations of tobacco sales regulations might affect Myanmar high school students' tobacco  
52  
53  
54 155 use. The present study aims to investigate (1) the prevalence of TAPS and illicit tobacco sale

1  
2  
3  
4 156 exposures and (2) their associations with current tobacco use among Myanmar high school  
5  
6  
7 157 students.  
8  
9

## 10 158 **MATERIALS AND METHODS**

### 11 159 *Study population*

12  
13  
14  
15  
16  
17  
18 160 A cross-sectional study was conducted among grade 10 and 11 high school students from  
19  
20  
21 161 seven high schools in Shan State, Mon State, Bago region, and Magway region in Myanmar.  
22  
23  
24 162 A simple random sampling technique using a drawing method was applied to select the study  
25  
26  
27 163 areas and schools. The details of the sampling procedure have been described elsewhere.<sup>26)</sup> In  
28  
29  
30 164 total, 1,339 high school students answered a self-administrated questionnaire. Of these, 165  
31  
32  
33 165 were excluded due to missing or incomplete responses to TAPS exposure questions. In sum,  
34  
35  
36 166 the total number of participants was 1,174 (482 males and 692 females) and the response rate  
37  
38  
39 167 was 87.7%.  
40  
41  
42

### 43 168 *Data collection*

44  
45  
46  
47 169 Data were collected by using a pre-tested, anonymous, paper and pencil self-administered  
48  
49  
50 170 questionnaire. The questionnaire in the Myanmar language contained 40 questions, covering  
51  
52  
53 171 nine components: 1) background information, 2) experience with tobacco products, 3)  
54  
55  
56 172 exposure to second-hand smoking, 4) perception of smoked and smokeless tobacco products,  
57  
58  
59  
60

1  
2  
3  
4 173 5) sale of tobacco, 6) health warnings and information, 7) tobacco advertisement, promotion,  
5  
6  
7 174 and sponsorship, 8) smoke-free areas, and 9) the Tobacco Control Law and its enforcement.  
8  
9

10  
11 175 ***Study measures***  
12

13  
14  
15 176 ***Dependent variable***  
16

17  
18 177 The outcome variable was “current tobacco use” among high school students. It was defined  
19  
20  
21 178 as the use of any kind of smoked or smokeless tobacco product on at least one occasion  
22  
23  
24 179 within the 30 days preceding the survey.  
25  
26

27  
28 180 ***Independent variables***  
29

30  
31  
32 181 After controlling socio-demographic characteristics, smoking exposure at home and school,  
33  
34  
35 182 receiving health education about tobacco use, and the perception of tobacco use as covariates,  
36  
37  
38 183 the independent variables in this study were participants’ exposure to any kind of TAPS and  
39  
40  
41 184 illicit tobacco sale exposures. “Exposure to any kind of TAPS” was defined using the  
42  
43  
44 185 following variables: 1) having seen or heard tobacco advertisements or sponsorship in any  
45  
46  
47 186 form, 2) having seen any goods displaying the label of any tobacco product being used in  
48  
49  
50 187 promotion, and 3) having seen any toy, comestible, or wares made in the form of any tobacco  
51  
52  
53 188 product. If a student had had at least one TAPS exposure, the response was counted as a  
54  
55  
56 189 “Yes,” and if they had never experienced exposure, their response was counted as a “No.”  
57  
58

1  
2  
3  
4 190 For illicit tobacco sale exposures, we measured four different types of tobacco sales  
5  
6  
7 191 to students contravening several of the tobacco sale regulations prohibited by Myanmar  
8  
9  
10 192 Tobacco Control Law. These four variables were: 1) having seen any smoked tobacco product  
11  
12  
13 193 for sale inside or within 100 feet of the school premises within the last 12 months, 2) having  
14  
15  
16 194 seen the sale or gifting of any smoked tobacco product to minors within the last 12 months, 3)  
17  
18  
19 195 having seen the sale or distribution of any smoked tobacco product by minors within the last  
20  
21  
22 196 12 months, and 4) having seen the sale of cigarettes singly or in packs containing less than 20  
23  
24  
25 197 within the last 12 months.  
26  
27

### 28 29 198 *Study analysis*

30  
31  
32 199 The data were coded, entered, and analysed using the Statistical Package for Social Science  
33  
34  
35 200 (SPSS) software program version 24.0 (IBM SPSS Inc.). Categorical data were analysed by  
36  
37  
38 201 chi-square tests for hypothesis testing. For multivariable logistic regression, all the variables  
39  
40  
41 202 were re-coded on a dichotomous scale. All analyses were two-tailed, setting  $p < 0.05$  as the  
42  
43  
44 203 significance value.  
45  
46  
47

### 48 204 *Public and patient involvement statement*

49  
50  
51 205 Patients and members of the public were not involved in the design of this study. The study  
52  
53  
54 206 findings will be disseminated within Ministries.  
55  
56  
57

## 58 207 **RESULTS**

1  
2  
3  
4 208 Table 1 shows the characteristics of the study participants by gender. Most of the participants  
5  
6  
7 209 (84.7%) were younger than or equal to 15 years of age. More than two-thirds of the students  
8  
9  
10 210 (68.5% of males and 67.1% of females) were grade 10 students. Of those who took part,  
11  
12  
13 211 25.3% of male and 1.3% of female students were current users of smoked or smokeless  
14  
15  
16 212 tobacco at the time of the survey. Male students had more exposure to parental smoking  
17  
18  
19 213 (6.0%), sibling smoking (11.4%), and peer smoking (9.3%) than did female students. Nearly  
20  
21  
22 214 two-thirds of females (66.0%) reported receiving health education about tobacco use,  
23  
24  
25 215 compared to 52.7% of males. Regarding the perception of tobacco use, out of eight items, we  
26  
27  
28 216 set the mean score of seven as the cut-off point. Overall, 68.7% of males and 83.2% of  
29  
30  
31 217 females scored more than seven.  
32  
33  
34

35 218 Table 2 presents different kinds of TAPS exposures and its associations with current  
36  
37  
38 219 tobacco use among the study participants. In total, 90.9% had TAPS exposure in any form.  
39  
40  
41 220 The findings indicate that 71.7% had seen or heard of tobacco advertisement and sponsorship  
42  
43  
44 221 in any form, and 68.1% had seen goods displaying the label of any tobacco product being  
45  
46  
47 222 used in promotions. One out of three students had seen toys, comestibles or wares made in the  
48  
49  
50 223 form of any tobacco product. More than one-third of the participants (35.3%) had seen or  
51  
52  
53 224 heard tobacco advertisements in sponsorship or support of sports, funfairs, exhibitions, or  
54  
55  
56 225 other social activities.  
57  
58  
59  
60

1  
2  
3  
4 226 Table 3 describes illicit tobacco sale exposures and their associations with current  
5  
6  
7 227 tobacco use among the study participants. Within the last 12 months, more than 80.0% had  
8  
9  
10 228 been exposed to the sale of any smoked tobacco product inside or within 100 feet of the  
11  
12  
13 229 school premises, the sale or gifting of any smoked tobacco product to minors, or the sale of  
14  
15  
16 230 cigarettes singly or in packs of less than 20. Nearly 56.0% had seen the sale or distribution of  
17  
18  
19 231 any smoked tobacco product by minors.  
20  
21  
22

23 232 Table 4 presents the unadjusted odds ratio (UOR), adjusted odds ratio (AOR), and  
24  
25  
26 233 95% confidence intervals (CI) of current tobacco use among Myanmar high school students.  
27  
28  
29 234 In the binary logistic regression, being a grade 11 student (UOR 3.24; 95% CI 2.24-4.70) and  
30  
31  
32 235 having seen the sale of cigarettes, either singly or in packs of less than 20 (UOR 7.45; 95%CI  
33  
34  
35 236 2.34–23.70) were associated with current tobacco use.  
36  
37  
38

39 237 From the multiple logistic regression, current tobacco use was found to be positively  
40  
41  
42 238 associated with being over 14 years old (AOR 9.81; 95%CI 4.54–21.19); being male (AOR  
43  
44  
45 239 28.06; 95%CI 13.29–59.25); being exposed to any kind of TAPS (AOR 6.59; 95%CI 2.33–  
46  
47  
48 240 18.64); having seen any smoked tobacco product for sale inside or within 100 feet of the  
49  
50  
51 241 school premises within the last 12 months (AOR 4.17; 95%CI 1.65–10.58); having seen the  
52  
53  
54 242 sale or gifting of any smoked tobacco product to minors within the last 12 months (AOR 6.40;  
55  
56  
57 243 95%CI 2.18–19.12); and having seen the sale or distribution of any smoked tobacco product  
58  
59  
60

1  
2  
3  
4 244 by minors within the last 12 months (AOR 2.42; 95% CI 1.42–4.10). Having ever received  
5  
6  
7 245 health education about tobacco use (AOR 0.45; 95% CI 0.27–0.78) and having a higher  
8  
9  
10 246 perception score with regards to tobacco use (AOR 0.17; 95% CI 0.10–0.30) were negatively  
11  
12  
13 247 associated with current tobacco use (Table 3).

## 17 248 **DISCUSSION**

18  
19  
20 249 To the best of our knowledge, this is the first study to report the associations of current  
21  
22  
23 250 tobacco use with TAPS and illicit tobacco sale exposures among high school students in  
24  
25  
26 251 Myanmar. The majority of the study participants reported having been exposed to TAPS and  
27  
28  
29 252 illicit tobacco sales. TAPS exposure and illicit tobacco sale exposures increase the odds of  
30  
31  
32 253 current tobacco use among high school students.

33  
34  
35 254 In this study, a high prevalence of TAPS exposure (91%) was reported among high school  
36  
37  
38 255 students in Myanmar, a country that has completely banned all forms of direct or indirect  
39  
40  
41 256 TAPS, including Corporate Social Responsibility (CSR) activities by the tobacco industry.<sup>27)</sup>  
42  
43  
44 257 Myanmar has a well-established Tobacco Control Law named the “Control of Smoking and  
45  
46  
47 258 Consumption of Tobacco Product Law,” which has been enacted since 2006.<sup>27)</sup> However, the  
48  
49  
50 259 monitoring, reporting and punishment of TAPS activities prohibited by the law are not  
51  
52  
53 260 common in Myanmar. Other studies conducted in Myanmar also pointed out that the  
54  
55  
56 261 awareness of the tobacco control law among high school students was low and that the lack of

1  
2  
3  
4 262 tobacco control law enforcement was in a critical state.<sup>19,26)</sup> It is not rare to see sponsored  
5  
6  
7 263 events and CSR activities executed by tobacco companies, violating the TAPS regulations  
8  
9  
10 264 and reframing tobacco products' image among Myanmar youths.<sup>19,26)</sup> The global tobacco  
11  
12  
13 265 industry has been focusing on expanding its market in developing countries that have low  
14  
15  
16 266 tobacco taxes, partial TAPS bans, and weak law enforcement of TAPS regulations, rather than  
17  
18  
19 267 in developed countries with high tobacco taxes, comprehensive and complete TAPS bans, and  
20  
21  
22 268 the strict implementation of TAPS regulations.<sup>28-31)</sup>

25 269 The weakness of tobacco control law enforcement in Myanmar creates opportunities  
26  
27  
28 270 for tobacco companies and retailers to violate it. Nigerian researchers have reported that  
29  
30  
31 271 exposure to events sponsored by the tobacco industry was associated with current cigarette  
32  
33  
34 272 use and demonstrated the importance of the tobacco control law and its enforcement in  
35  
36  
37 273 reducing tobacco use. Our findings highlighted the urgent need to enforce this law in  
38  
39  
40 274 Myanmar to reduce TAPS exposure among adolescents in order to decrease tobacco use. It  
41  
42  
43 275 also encourages Myanmar policymakers to formulate specific TAPS regulations addressing  
44  
45  
46 276 newly developed smoking and smokeless tobacco products and complete comprehensive  
47  
48  
49 277 TAPS bans, including cross-border TAPS. Local authorities need to monitor TAPS among  
50  
51  
52 278 Myanmar youths strictly and to punish the tobacco companies, stores, and retailers violating  
53  
54  
55 279 TAPS regulations.



1  
2  
3  
4 280 High school students exposed to TAPS in any form were six times more likely to be  
5  
6  
7 281 current tobacco users than those without any TAPS exposure. A recent study from Myanmar  
8  
9  
10 282 has reported that only half of the high school students had heard about the Tobacco Control  
11  
12  
13 283 Law, and none of the study participants had ever heard of any reporting of or punishment for  
14  
15  
16 284 any violation of the Tobacco Control Law that bans TAPS activities and tobacco sales among  
17  
18  
19 285 minors.<sup>26)</sup> Our study suggests that Myanmar high school students should be properly informed  
20  
21  
22 286 not only about the dangers of TAPS exposure but also about the country's Tobacco Control  
23  
24  
25 287 Law and its punishments.

26  
27  
28  
29 288 In this study, the prevalence of current tobacco use among Myanmar high school  
30  
31  
32 289 students was 11.2%, which is higher than the national figure of 9.8% reported in the 2016  
33  
34  
35 290 WHO GSHS for students between 13 and 17 years old in Myanmar.<sup>18)</sup> Our study also reported  
36  
37  
38 291 that male high school students were more likely to be current tobacco users than their female  
39  
40  
41 292 peers were. A sub-national-level study also reported a considerably high prevalence of  
42  
43  
44 293 smoked (34.7%) and smokeless tobacco use (28.3%) among high school students.<sup>19)</sup> The  
45  
46  
47 294 findings suggest Myanmar policymakers to consider both smoked and smokeless tobacco use  
48  
49  
50 295 among adolescents as a public health priority and to put more effort into implementing control  
51  
52  
53 296 measures.

54  
55  
56  
57 297 In Myanmar, it has been reported that there were only three full-time staff assigned  
58  
59  
60

1  
2  
3  
4 298 to national tobacco control, meaning they were each responsible for 2,080,000 smokers.<sup>32)</sup>  
5  
6

7 299 The country also has an insufficient government budget for tobacco control and there is no  
8  
9

10 300 health promotion funding mechanism in place for the use of tobacco taxes.<sup>32)</sup> To tackle the  
11  
12

13 301 current situation in Myanmar, the effective implementation of tobacco control measures is  
14  
15

16 302 needed to reduce current tobacco use, and human and financial resources for national tobacco  
17  
18

19 303 control should be improved.  
20  
21  
22

23 304 Increasing tobacco tax, as recommended for implementation of Article 6 of the WHO  
24  
25

26 305 FCTC, functions as a cost-effective demand-reducing measure in global tobacco control.<sup>32)</sup>  
27  
28

29 306 However, cigarettes in Myanmar are relatively cheap, indicating that the country's tobacco  
30  
31

32 307 tax policies need to be re-evaluated. Among the Association of Southeast Asian Nations  
33  
34

35 308 (ASEAN), the price of the most popular local cigarette brand in Myanmar is the second  
36  
37

38 309 lowest (0.6 USD/20-stick pack), and that of the most popular foreign brand in Myanmar is the  
39  
40

41 310 fourth highest (2.11 USD/20-stick pack).<sup>32)</sup> This indicates a gap in tax differences between  
42  
43

44 311 local and foreign brands of cigarettes. The price at which youths in Myanmar are deterred  
45  
46

47 312 from smoking is reportedly 11 USD/20-stick pack, the lowest among the ASEAN.<sup>32)</sup>  
48  
49

50 313 Therefore, the Myanmar government should reevaluate tobacco tax levels and adjust tax  
51  
52

53 314 policies to decrease tobacco use and TAPS exposures.  
54  
55  
56  
57  
58  
59  
60

1  
2  
3  
4 315 In this study, students who had seen any smoked tobacco product for sale inside or  
5  
6  
7 316 within 100 feet of the school premises during the last 12 months were four times more likely  
8  
9  
10 317 to be current tobacco users than their peers were. It is illegal to sell any kind of smoked  
11  
12  
13 318 tobacco products inside or within 100 feet of school premises in Myanmar.<sup>27)</sup> This finding  
14  
15  
16 319 implies that the lack of monitoring and reporting of illicit tobacco sales inside or near school  
17  
18  
19 320 premises exerts an influence on current tobacco use among Myanmar high school students. In  
20  
21  
22 321 addition, these illicit tobacco sales provide easy access to tobacco for students as well as for  
23  
24  
25 322 school personnel, triggering second-hand smoking exposure and student curiosity about  
26  
27  
28 323 tobacco use. Therefore, school personnel, students, and parents should monitor and report any  
29  
30  
31 324 illicit tobacco sales to local authorities and actions should be taken according to the rules and  
32  
33  
34 325 regulations.

35  
36  
37 326 However, there is no specific regulation on smokeless tobacco sales and distributions  
38  
39  
40 327 to and by minors in Myanmar, the sale or gifting of any smoked tobacco product to minors  
41  
42  
43 328 and the sale or distribution of any smoked tobacco product by minors are illegal.<sup>27)</sup>  
44  
45  
46 329 Nonetheless, 82.5% of participants in this study reported that they had seen someone selling  
47  
48  
49 330 or gifting of any smoked tobacco product to a minor within the last 12 months, and 55.6% of  
50  
51  
52 331 the participants reported having witnessed the sale or distribution of any smoked tobacco  
53  
54  
55 332 product by minors within the last 12 months. The study also revealed that having seen these

1  
2  
3  
4 333 two illicit tobacco activities within the last 12 months was significantly associated with  
5  
6  
7 334 current tobacco use among the study participants. A study of adolescents in the United States  
8  
9  
10 335 has also reported an association between smokeless tobacco use and smoking.<sup>33)</sup> In order to  
11  
12  
13 336 reduce current tobacco use among Myanmar high school students, this study recommends the  
14  
15  
16 337 urgent need of specific smokeless tobacco regulations concerning sales made to and by  
17  
18  
19 338 minors in Myanmar, and strict law enforcement on sales and distributions all smoked and  
20  
21  
22 339 smokeless tobacco to and by minors in the country.  
23  
24

25 340 Another common violation of the Tobacco Control Law in Myanmar is the sale of  
26  
27  
28 341 cigarettes singly or in packs of less than 20. Despite the significant price difference<sup>32)</sup> both  
29  
30  
31 342 foreign and local brands become affordable for smokers when they are sold singly or in packs  
32  
33  
34 343 of less than 20. Such sales are contrary to the demand-reducing tobacco control measures of  
35  
36  
37 344 the national policy and negatively affect the tobacco use of all age groups, especially  
38  
39  
40 345 adolescents.  
41  
42

43 346 In addition, other smoked and smokeless tobacco products, such as cheroots, cigars,  
44  
45  
46 347 pipes, betel quids, etc., can be purchased singly or in small quantities in Myanmar. To reduce  
47  
48  
49 348 tobacco use in all age groups, our study recommends that the 2006 Tobacco Control Law be  
50  
51  
52 349 updated to address the sale and purchase of all forms of smoked and smokeless tobacco  
53  
54  
55 350 products in small quantities, along with strict law enforcement, especially among minors.  
56  
57  
58  
59  
60

1  
2  
3  
4 351 The findings of this study imply that effective health education and high perception  
5  
6  
7 352 of tobacco use can be effective factors in combating the current tobacco use among Myanmar  
8  
9  
10 353 high school students. In this study, students who had received health education about tobacco  
11  
12  
13 354 use and those with a higher perception score of tobacco use were less likely to be current  
14  
15  
16 355 tobacco users than their counterparts. Nearly two-thirds of the participants had received health  
17  
18  
19 356 education about tobacco use, and nearly 80% had a higher perception score. Health education  
20  
21  
22 357 programs and tobacco control measures targeting the young should address the newly  
23  
24  
25 358 developed and popular tobacco products like electronic cigarettes, shisha, pipes, menthol and  
26  
27  
28 359 fruit-flavoured cigarettes etc. Youths' awareness of not only the harms of tobacco products but  
29  
30  
31 360 also the country's Tobacco Control Law should be promoted.  
32  
33

34 361 The study findings also revealed that 10.7% of current tobacco users were 14 years  
35  
36  
37 362 old or less. Another Myanmar researcher has reported that the average age for first tobacco  
38  
39  
40 363 use is 14 years.<sup>19)</sup> Therefore, tobacco control intervention measures should be introduced to  
41  
42  
43 364 Myanmar high school students before the age of 14. Awareness of the Tobacco Control Law  
44  
45  
46 365 remains quite low in Myanmar.<sup>19,26)</sup> Furthermore, the provision of health education via youth-  
47  
48  
49 366 friendly media, such as the internet, mobile applications, and social networking services, may  
50  
51  
52 367 attract more attention from high school students.  
53  
54  
55  
56  
57  
58  
59  
60

1  
2  
3  
4 368 In contrast to other studies,<sup>19,26)</sup> parental smoking, sibling smoking, and peer smoking  
5  
6  
7 369 were not found to be associated with current tobacco use in this study. This may be because  
8  
9  
10 370 only the smoking status of parents, siblings and peers of the participants was assessed in this  
11  
12  
13 371 study and most of the study participants did not have exposure to parents, siblings, or peers  
14  
15  
16 372 who smoked. Having high knowledge and perception about tobacco use may also have  
17  
18  
19 373 prevented them from using tobacco.<sup>19)</sup>  
20  
21

22 374 Despite being the very first study in Myanmar to report the associations between  
23  
24  
25 375 current tobacco use, TAPS and illicit tobacco sale exposure among Myanmar high school  
26  
27  
28 376 students, the present study did not explore the associations of first-time or daily tobacco use,  
29  
30  
31 377 and TAPS or illicit tobacco sales among Myanmar high school students. This study was  
32  
33  
34 378 conducted among 1,174 high school students from two states and two regions out of a total of  
35  
36  
37 379 seven states, seven regions and one territory of Myanmar, and its findings cannot be  
38  
39  
40 380 generalized for the whole nation. Due to the limitations of the cross-sectional nature of our  
41  
42  
43 381 study, we recommend further interventional or longitudinal studies of TAPS and sales  
44  
45  
46 382 exposure for a better understanding of adolescent tobacco use in Myanmar.  
47  
48

## 49 383 **CONCLUSIONS**

50  
51  
52  
53 384 This study reported high prevalences of TAPS and illicit tobacco sales exposures among  
54  
55  
56 385 Myanmar high school students. Current tobacco use among Myanmar high school students  
57  
58  
59  
60

1  
2  
3  
4 386 was statistically associated with overall TAPS exposure. Violations of tobacco sales  
5  
6  
7 387 regulations were reported to be strong risk factors for current smoked and smokeless tobacco  
8  
9  
10 388 use among Myanmar high school students. Our findings highlight that Myanmar's Tobacco  
11  
12  
13 389 Control Law enforcement is in an alarming state and requires urgent improvement. Sales and  
14  
15  
16 390 purchase of not only cigarettes but also all forms of smoked and smokeless tobacco products  
17  
18  
19 391 in small quantities should be regulated. Specific smokeless tobacco sale regulations for  
20  
21  
22 392 minors are urgently needed in the country.  
23  
24

### 25 26 393 **ABBREVIATIONS**

|        |      |                                                 |
|--------|------|-------------------------------------------------|
| 27     |      |                                                 |
| 28     |      |                                                 |
| 29 394 | TAPS | Tobacco Advertising, Promotion, and Sponsorship |
| 30     |      |                                                 |
| 31     |      |                                                 |
| 32 395 | AOR  | Adjusted Odds Ratios                            |
| 33     |      |                                                 |
| 34     |      |                                                 |
| 35 396 | UOR  | Unadjusted Odds Ratios                          |
| 36     |      |                                                 |
| 37     |      |                                                 |
| 38 397 | CI   | Confidence Intervals                            |
| 39     |      |                                                 |
| 40     |      |                                                 |
| 41 398 | WHO  | World Health Organization                       |
| 42     |      |                                                 |
| 43     |      |                                                 |
| 44 399 | GYTS | Global Youth Tobacco Survey                     |
| 45     |      |                                                 |
| 46     |      |                                                 |
| 47 400 | GSHS | Global School-based Student Health Survey       |
| 48     |      |                                                 |
| 49     |      |                                                 |
| 50 401 | FCTC | Framework Convention on Tobacco Control         |
| 51     |      |                                                 |
| 52     |      |                                                 |
| 53 402 | SPSS | Statistical Package for Social Science          |
| 54     |      |                                                 |
| 55     |      |                                                 |
| 56 403 | IBM  | International Business Machines                 |
| 57     |      |                                                 |
| 58     |      |                                                 |

|    |     |                                                                                                     |                                         |
|----|-----|-----------------------------------------------------------------------------------------------------|-----------------------------------------|
| 1  |     |                                                                                                     |                                         |
| 2  |     |                                                                                                     |                                         |
| 3  |     |                                                                                                     |                                         |
| 4  | 404 | CSR                                                                                                 | Corporate Social Responsibility         |
| 5  |     |                                                                                                     |                                         |
| 6  |     |                                                                                                     |                                         |
| 7  | 405 | ASEAN                                                                                               | Association of South-East Asian Nations |
| 8  |     |                                                                                                     |                                         |
| 9  |     |                                                                                                     |                                         |
| 10 | 406 | USD                                                                                                 | The United States Dollar                |
| 11 |     |                                                                                                     |                                         |
| 12 |     |                                                                                                     |                                         |
| 13 | 407 |                                                                                                     |                                         |
| 14 |     |                                                                                                     |                                         |
| 15 |     |                                                                                                     |                                         |
| 16 | 408 | <b>ACKNOWLEDGEMENTS</b>                                                                             |                                         |
| 17 |     |                                                                                                     |                                         |
| 18 |     |                                                                                                     |                                         |
| 19 | 409 | The authors would like to thank Ministry of Health and Sports and Ministry of Education in          |                                         |
| 20 |     |                                                                                                     |                                         |
| 21 | 410 | Myanmar for granting a permission to collect the data at high schools. We also would like to        |                                         |
| 22 |     |                                                                                                     |                                         |
| 23 |     |                                                                                                     |                                         |
| 24 | 411 | thank the local authorities in the survey areas, the staff from participating schools, last but not |                                         |
| 25 |     |                                                                                                     |                                         |
| 26 | 412 | least, all the high school students those who participated voluntarily in this study.               |                                         |
| 27 |     |                                                                                                     |                                         |
| 28 |     |                                                                                                     |                                         |
| 29 | 413 | <b>Funding statement</b>                                                                            |                                         |
| 30 |     |                                                                                                     |                                         |
| 31 |     |                                                                                                     |                                         |
| 32 | 414 | This research received no specific grant from any funding agency in the public, commercial or       |                                         |
| 33 |     |                                                                                                     |                                         |
| 34 | 415 | not-for-profit sectors.                                                                             |                                         |
| 35 |     |                                                                                                     |                                         |
| 36 |     |                                                                                                     |                                         |
| 37 | 416 | <b>Data sharing statement</b>                                                                       |                                         |
| 38 |     |                                                                                                     |                                         |
| 39 |     |                                                                                                     |                                         |
| 40 | 417 | No additional data are available.                                                                   |                                         |
| 41 |     |                                                                                                     |                                         |
| 42 |     |                                                                                                     |                                         |
| 43 | 418 | <b>Author contributions</b>                                                                         |                                         |
| 44 |     |                                                                                                     |                                         |
| 45 |     |                                                                                                     |                                         |
| 46 | 419 | YMS and NNL conceptualised the study and designed the study. NNL, and TNS contributed               |                                         |
| 47 |     |                                                                                                     |                                         |
| 48 |     |                                                                                                     |                                         |
| 49 | 420 | to data collection and data acquisition. YMS, TNS, HH, and SMC performed data analyses              |                                         |
| 50 |     |                                                                                                     |                                         |
| 51 | 421 | and data interpretations. YMS, HH, and SMC wrote the first draft of the manuscript. MK,             |                                         |
| 52 |     |                                                                                                     |                                         |
| 53 | 422 | TMT, EMW, TK, EY, and ZZA contributed to data acquisition. NH contributed to the study              |                                         |
| 54 |     |                                                                                                     |                                         |
| 55 |     |                                                                                                     |                                         |
| 56 | 423 | design, data interpretation, and revising the manuscript. YMS, TNS, SMC, and NH revised             |                                         |
| 57 |     |                                                                                                     |                                         |
| 58 | 424 | and edited the manuscript. All authors had full access to the data, and take responsibility to      |                                         |
| 59 |     |                                                                                                     |                                         |
| 60 |     |                                                                                                     |                                         |



1  
2  
3  
4 425 the accuracy of data analysis. All authors approved the final manuscript and agreed to submit  
5  
6 426 it for publication and take accountability.  
7  
8

9 427 **Ethical approval and consent to participate**  
10

11  
12 428 This study was ethically approved by the Department of Medical Services, Ministry of Health  
13  
14 429 and Sports, Myanmar (Letter No. 617 of Planning/Research issued on August 26, 2015), and  
15  
16 430 the Ministry of Education, Myanmar (Letter No. 12125 of Information/Research issued on  
17  
18 431 October 19, 2015), as well as the ethical review committee of Nagoya University School of  
19  
20 432 Medicine (No. 6518 issued on August 31, 2015). To conduct this school- based survey,  
21  
22 433 permissions from Ministry of Education, Regional Offices of Basic Education, Ministry of  
23  
24 434 Health and Sports, local educational steering committees and authorities, the schools'  
25  
26 435 authorities, the headmasters of participated schools and local Parents-Teacher Associations  
27  
28 436 were obtained. The survey procedure was approved by Ministry of Education and Ministry of  
29  
30 437 Health and Sports. After thoroughly explaining the study's objectives, contents of the survey  
31  
32 438 questionnaire, and rights of the study participants, the written-informed consents from local  
33  
34 439 educational steering committees and authorities, the schools' authorities, the headmasters of  
35  
36 440 participated schools, local Parents-Teacher Associations, and parents were obtained. One  
37  
38 441 week prior to the survey, the information sheet and the written-informed consents that stating  
39  
40 442 the study's objectives, the survey's procedure and the contents of the questionnaires, and the  
41  
42 443 rights of the study participants were sent to parents. Researchers also explained the study's  
43  
44 444 objectives, contents of the survey questionnaire, the voluntary nature and procedure of the  
45  
46 445 survey, and the rights of the participants to collaborators, students and teachers before  
47  
48 446 conducting the survey. All data collection and analytical processes remain anonymous for  
49  
50 447 privacy and confidentiality. The locations, names, and numbers of the eligible participants of  
51  
52 448 the schools involved were not documented.  
53  
54  
55  
56  
57  
58  
59  
60

1  
2  
3  
4 449 **Competing interests**  
5

6  
7 450 All authors declared no conflicts of interest for this study.  
8

9  
10 451 **Additional file**  
11

12  
13 452 There is no additional files.  
14

15  
16 453  
17  
18  
19  
20  
21  
22  
23  
24  
25  
26  
27  
28  
29  
30  
31  
32  
33  
34  
35  
36  
37  
38  
39  
40  
41  
42  
43  
44  
45  
46  
47  
48  
49  
50  
51  
52  
53  
54  
55  
56  
57  
58  
59  
60

For peer review only

## 454 REFERENCES

- 455 1. World Health Organization. *WHO global report on trends in prevalence of tobacco*  
456 *smoking 2000–2025, second edition*.  
457 [https://www.who.int/tobacco/publications/surveillance/trends-tobacco-smoking-](https://www.who.int/tobacco/publications/surveillance/trends-tobacco-smoking-second-edition/en/)  
458 [second-edition/en/](https://www.who.int/tobacco/publications/surveillance/trends-tobacco-smoking-second-edition/en/). Accessed May 5, 2019.
- 459 2. Gentzke AS, Creamer M, Cullen KA, et al. Vital Signs: Tobacco Product Use among  
460 Middle and High School Students - United States, 2011-2018. *MMWR Morb Mortal*  
461 *Wkly Rep*. 2019;68(6):157–164. doi:10.15585/mmwr.mm6806e1.
- 462 3. Sinha D N, Palipudi K M, Jones C K, et al. Levels and trends of smokeless tobacco  
463 use among youth in countries of the World Health Organization South-East Asia  
464 Region. *Indian J Cancer*. 2014;51(5):50-53. doi:10.4103/0019-509X.147472.
- 465 4. World Health Organization, Regional Office for South-East Asia. (2015). Monitoring  
466 tobacco control among youth in countries of the South-East Asia Region: 2014. World  
467 Health Organization. <https://apps.who.int/iris/handle/10665/155159>. Accessed Nov  
468 24, 2019.
- 469 5. Tun NA, Chittin T, Agarwal N, et al. Tobacco use among young adolescents in  
470 Myanmar: Findings from global youth tobacco survey. *Indian J Public Health* 2017;  
471 61(Suppl 1):S54-S59. doi: 10.4103/ijph.IJPH\_236\_17.
- 472 6. World Health Organization, Regional Office for South-East Asia. (2012). Expert  
473 group meeting on smokeless tobacco control and cessation: New Delhi, India, 16-17  
474 August 2011. WHO Regional Office for South-East Asia.  
475 <https://apps.who.int/iris/handle/10665/205054>. Accessed Nov 24, 2019.
- 476 7. World Health Organization. *WHO global report: mortality attributable to tobacco*.  
477 [https://www.who.int/tobacco/publications/surveillance/rep\\_mortality\\_attributable/en/](https://www.who.int/tobacco/publications/surveillance/rep_mortality_attributable/en/).  
478 Accessed April 27, 2019.
- 479 8. Oberg M, Jaakkola MS, Woodward A, Peruga A, Prüss-Ustün A. *Worldwide burden*  
480 *of disease from exposure to second-hand smoke: a retrospective analysis of data from*  
481 *192 countries*. *Lancet*. 2011;377(9760):139-146. doi:10.1016/S01406736(10)61388-8.
- 482 9. Selya AS, Dierker L, Rose JS, Hedeker D, Mermelstein RJ. Early-emerging nicotine  
483 dependence has lasting and time-varying effects on adolescent smoking behavior.  
484 *Prev Sci*. 2016;17(6):743-750. doi:10.1007/s11121-016-0673-0.
- 485 10. Centers for Disease Control and Prevention. *The health consequences of smoking- 50*  
486 *years of progress: A report of the Surgeon General*.  
487 <https://www.surgeongeneral.gov/library/reports/50-years-of-progress/full-report.pdf>.  
488 Accessed April 29, 2019.

- 1  
2  
3 489 11. Robert PO, Kuipers MAG, Rathmann K, et al. Academic performance and adolescent  
4 490 smoking in 6 European cities: the role of friendship ties. *Int J Adolesc Youth*.  
5 491 2019;24(1):125-135. doi:10.1080/02673843.2018.1475288.  
6  
7 492 12. Treur JL, Willemsen G, Bartels M, et al. Smoking during adolescence as a risk factor  
8 493 for attention problems. *Biol Psychiatry*. 2015;78(9):656-63.  
9 494 doi:10.1016/j.biopsych.2014.06.019.  
10  
11 495 13. Kyaing NN, Sein T, Sein AA, Htike MMT, Tun A, Shein NN. Smokeless tobacco use  
12 496 in Myanmar. *Indian J Cancer*. 2012; 49(4): 347–351. doi:10.4103/0019-509X.107727.  
13  
14 497 14. Muthukrishnan A, Warnakulasuriya S. Oral health consequences of smokeless tobacco  
15 498 use. *Indian J Med Res*. 2018;148(1):35–40. doi:10.4103/ijmr.IJMR\_1793\_17.  
16  
17 499 15. Gupta S, Gupta R, Sinha DN, Mehrotra R. Relationship between type of smokeless  
18 500 tobacco & risk of cancer: A systematic review. *Indian J Med Res*. 2018;148(1):56–76.  
19 501 doi:10.4103/ijmr.IJMR\_2023\_17.  
20  
21 502 16. Rostron BL, Chang JT, Anic GM, Tanwar M, Chang CM, Corey CG. Smokeless  
22 503 tobacco use and circulatory disease risk: a systematic review and meta-analysis. *Open*  
23 504 *Heart*. 2018;5(2):e000846. doi:10.1136/openhrt-2018-000846.  
24  
25 505 17. World Health Organization. *Report of fifth Global Youth Tobacco Survey (GYTS)*  
26 506 *Myanmar, 2016*. <https://apps.who.int/iris/handle/10665/274351>. Accessed May 2,  
27 507 2019.  
28  
29 508 18. World Health Organization. *Report of second Global School-based Student Health*  
30 509 *Survey in Myanmar 2016*. <http://www.who.int/iris/handle/10665/274350>. Accessed  
31 510 May 2, 2019.  
32  
33 511 19. Myint MNT, Yamamoto E, Ko MH, Khaing M, Reyer JA, Hamajima N. Knowledge,  
34 512 attitude, and usage pattern of tobacco among high school students in Nay Pyi Taw,  
35 513 Myanmar. *Nagoya J Med Sci*. 2019;81(1):65–79. doi:10.18999/nagjms.81.1.65.  
36  
37 514 20. Prabandari YS, Dewi A. How do Indonesian youth perceive cigarette advertising? A  
38 515 cross-sectional study among Indonesian high school students. *Glob Health Action*.  
39 516 2016;9:30914. doi:10.3402/gha.v9.30914.  
40  
41 517 21. Chido-Amajuoyi OG, Mantey DS, Clendennen SL, Pérez A. Association of tobacco  
42 518 advertising, promotion and sponsorship (TAPS) exposure and cigarette use among  
43 519 Nigerian adolescents: implications for current practices, products and policies. *BMJ*  
44 520 *Glob Health*. 2017;2(3):e000357. doi:10.1136/bmjgh-2017-000357.  
45  
46 521 22. Braverman MT, Aaro LE. Adolescent smoking and exposure to tobacco marketing  
47 522 under a tobacco advertising ban: findings from 2 Norwegian national samples. *AmJ*  
48 523 *Public Health*. 2004;94(7):1230–1238.  
49  
50  
51  
52  
53  
54  
55  
56  
57  
58  
59  
60

- 1  
2  
3 524 23. Soneji S, Ambrose BK, Lee W, Sargent J, Tanski S. Direct-to-consumer tobacco  
4 525 marketing and its association with tobacco use among adolescents and young adults. *J*  
5 526 *Adolesc Health*. 2014;55(2):209–215. doi:10.1016/j.jadohealth.2014.01.019.  
6  
7 527 24. Morgenstern M, Sargent JD, Isensee B, Hanewinkel R. From never to daily smoking  
8 528 in 30 months: the predictive value of tobacco and nontobacco advertising exposure.  
9 529 *BMJ Open*.2013;3(6): e002907. doi: <http://dx.doi.org/10.1136/bmjopen-2013-002907>.  
12  
13 530 25. Akl EA, Jawad M, Lam WY, Co CN, Obeid R, Irani J. Motives, beliefs and attitudes  
14 531 towards waterpipe tobacco smoking: a systematic review. *Harm Reduct J*. 2013;10:12.  
15 532 doi:10.1186/1477-7517-10-12.  
16 533 26. LattNN, Saw YM, Myat Cho S, Kariya T, Yamamoto E, Hamajima N. Tobacco  
17 534 Control Law awareness, enforcement, and compliance among high school students in  
18 535 Myanmar. *Nagoya J Med Sci*. 2018;80(3):379–389. doi:10.18999/nagjms.80.3.379.  
19 536 27. Ministry of Health. *The control of smoking and consumption of Tobacco Product Law*.  
20 537 <https://seatca.org/dmdocuments/Myanmar%20-%20TC%20Law.pdf>. Accessed May  
21 538 17, 2019.  
22 539 28. Gilmore AB, Fooks G, DropeJ,Bialous SA, Jackson RR. Exposing and addressing  
23 540 tobacco industry conduct in low-income and middle-income countries. *Lancet*  
24 541 2015;385(9972):1029–1043. doi:10.1016/S0140-6736(15)60312-9.  
25 542 29. Gostin LO. FDA regulation of tobacco: politics, law, and the public's health. *JAMA*.  
26 543 2009;302(13):1459-1460. doi:10.1001/jama.2009.1421.  
27 544 30. Jamison N, Tynan M, MacNeil A, *et al*. Federal and state cigarette excise taxes -  
28 545 United States, 1995-2009. *MMWR Morb Mortal Wkly Rep*.2009;58(19):524–527.  
29 546 31. Chaloupka FJ, Yurekli A, Fong GT. Tobacco Taxes as a tobacco control strategy. *Tob*  
30 547 *Control* 2012;21(2):172–180. doi:10.1136/tobaccocontrol-2011-050417.  
31 548 32. Southeast Asia Tobacco Control Alliance. The Tobacco Control Atlas: ASEAN  
32 549 Region, Fourth Edition.  
33 550 [https://seatca.org/dmdocuments/Tobacco%20Control%20Atlas%20ASEAN%20Region](https://seatca.org/dmdocuments/Tobacco%20Control%20Atlas%20ASEAN%20Region%204th%20Ed%20Feb%202019.pdf)  
34 551 [n%204th%20Ed%20Feb%202019.pdf](https://seatca.org/dmdocuments/Tobacco%20Control%20Atlas%20ASEAN%20Region%204th%20Ed%20Feb%202019.pdf). Accessed May 19,2019.  
35 552 33. Wiener RC. Association of smokeless tobacco use and smoking in adolescents in the  
36 553 United States: an analysis of data from the Youth Risk Behavior Surveillance System  
37 554 survey, 2011. *J Am Dent Assoc*. 2013;144(8):930–938.  
38  
39  
40  
41  
42  
43  
44  
45  
46  
47  
48  
49  
50  
51  
52  
53  
54  
55  
56  
57  
58  
59  
60

1  
2  
3 556 **Table List**  
4

5  
6 557 **Table 1** Characteristics of study participants  
7

8 558 **Table 2** Different kinds of TAPS <sup>a)</sup> exposures among study participants  
9

10 559 **Table 3** Illicit tobacco sale exposures among study participants  
11

12 560 **Table 4** Odds ratio (OR) and 95% confidence interval (CI) of current tobacco use among  
13  
14 561 study participants.  
15  
16  
17  
18  
19  
20  
21  
22  
23  
24  
25  
26  
27  
28  
29  
30  
31  
32  
33  
34  
35  
36  
37  
38  
39  
40  
41  
42  
43  
44  
45  
46  
47  
48  
49  
50  
51  
52  
53  
54  
55  
56  
57  
58  
59  
60

For peer review only

## TABLES

**Table 1** Characteristics of study participants (N=1,174)

| Characteristics                                         | Male<br>(N=482) |      | Female<br>(N=692) |      | Total<br>(N=1,174) |      |
|---------------------------------------------------------|-----------------|------|-------------------|------|--------------------|------|
|                                                         | N               | %    | N                 | %    | N                  | %    |
| <b>Age</b>                                              |                 |      |                   |      |                    |      |
| ≤14 years                                               | 195             | 40.5 | 307               | 44.4 | 502                | 42.8 |
| 15 years                                                | 199             | 41.3 | 293               | 42.3 | 492                | 41.9 |
| 16 years                                                | 61              | 12.7 | 91                | 13.2 | 152                | 12.9 |
| 17 years                                                | 21              | 4.4  | 1                 | 0.1  | 22                 | 1.9  |
| ≥18 years                                               | 6               | 1.2  | 0                 | 0.0  | 6                  | 0.5  |
| <b>Grade</b>                                            |                 |      |                   |      |                    |      |
| 10                                                      | 330             | 68.5 | 464               | 67.1 | 794                | 67.6 |
| 11                                                      | 152             | 31.5 | 228               | 32.9 | 380                | 32.4 |
| <b>Current tobacco use</b>                              |                 |      |                   |      |                    |      |
| No                                                      | 360             | 74.7 | 683               | 98.7 | 1,043              | 88.8 |
| Yes                                                     | 122             | 25.3 | 9                 | 1.3  | 131                | 11.2 |
| <b>Parent smoking</b>                                   |                 |      |                   |      |                    |      |
| No                                                      | 453             | 94.0 | 662               | 95.7 | 1,115              | 95.0 |
| Yes                                                     | 29              | 6.0  | 30                | 4.3  | 59                 | 5.0  |
| <b>Sibling smoking</b>                                  |                 |      |                   |      |                    |      |
| No                                                      | 427             | 88.6 | 652               | 94.2 | 1,079              | 91.9 |
| Yes                                                     | 55              | 11.4 | 40                | 5.8  | 95                 | 8.1  |
| <b>Peer smoking</b>                                     |                 |      |                   |      |                    |      |
| No                                                      | 437             | 90.7 | 641               | 92.6 | 1,078              | 91.8 |
| Yes                                                     | 45              | 9.3  | 51                | 7.4  | 96                 | 8.2  |
| <b>Ever received health education about tobacco use</b> |                 |      |                   |      |                    |      |
| No                                                      | 228             | 47.3 | 235               | 34.0 | 463                | 39.4 |
| Yes                                                     | 254             | 52.7 | 457               | 66.0 | 711                | 60.6 |
| <b>Perception of tobacco use</b>                        |                 |      |                   |      |                    |      |
| ≤7                                                      | 151             | 31.3 | 116               | 16.8 | 267                | 22.7 |
| >7                                                      | 331             | 68.7 | 576               | 83.2 | 907                | 77.3 |

562

563

**Table 2** Different kinds of TAPS <sup>a)</sup> exposures among study participants (N=1,174)

| TAPS <sup>a)</sup>                                                                                                                                                                  | Use <sup>b)</sup><br>(N=131) |      | No use <sup>c)</sup><br>(N=1,043) |      | Total<br>(N=1,174) |      |
|-------------------------------------------------------------------------------------------------------------------------------------------------------------------------------------|------------------------------|------|-----------------------------------|------|--------------------|------|
|                                                                                                                                                                                     | N                            | %    | N                                 | %    | N                  | %    |
| <b>Ever seen or heard tobacco advertising and sponsorship in any form **</b>                                                                                                        |                              |      |                                   |      |                    |      |
| No                                                                                                                                                                                  | 25                           | 19.1 | 307                               | 29.4 | 332                | 28.3 |
| Yes                                                                                                                                                                                 | 106                          | 80.9 | 736                               | 70.6 | 842                | 71.7 |
| <b>Ever seen tobacco advertising signboards (vinyl, LED, stickers, etc.)</b>                                                                                                        |                              |      |                                   |      |                    |      |
| No                                                                                                                                                                                  | 128                          | 97.7 | 994                               | 95.3 | 1,122              | 52.0 |
| Yes                                                                                                                                                                                 | 3                            | 2.3  | 49                                | 4.7  | 52                 | 4.4  |
| <b>Ever seen tobacco advertising drawing or painting (on vehicles, on walls, on boards, etc.)</b>                                                                                   |                              |      |                                   |      |                    |      |
| No                                                                                                                                                                                  | 118                          | 90.1 | 925                               | 88.7 | 1,043              | 88.8 |
| Yes                                                                                                                                                                                 | 13                           | 9.9  | 118                               | 11.3 | 131                | 11.2 |
| <b>Ever seen tobacco advertising in journals, magazines, newspapers, and pamphlets</b>                                                                                              |                              |      |                                   |      |                    |      |
| No                                                                                                                                                                                  | 125                          | 95.4 | 998                               | 95.7 | 1,123              | 95.7 |
| Yes                                                                                                                                                                                 | 6                            | 4.6  | 45                                | 4.3  | 51                 | 4.3  |
| <b>Ever seen broadcasting of tobacco advertisements (TV, radio, internet, social network like Facebook, etc.)</b>                                                                   |                              |      |                                   |      |                    |      |
| No                                                                                                                                                                                  | 120                          | 91.6 | 982                               | 94.2 | 1,102              | 93.9 |
| Yes                                                                                                                                                                                 | 11                           | 8.4  | 61                                | 5.8  | 72                 | 6.1  |
| <b>Ever seen or heard about the distribution of tobacco products free of charge or as gifts</b>                                                                                     |                              |      |                                   |      |                    |      |
| No                                                                                                                                                                                  | 124                          | 94.7 | 953                               | 91.4 | 1,077              | 91.7 |
| Yes                                                                                                                                                                                 | 7                            | 5.3  | 90                                | 8.6  | 97                 | 8.3  |
| <b>Ever seen or heard distributions of personal goods with tobacco product labels free of charge or as gifts ***</b>                                                                |                              |      |                                   |      |                    |      |
| No                                                                                                                                                                                  | 64                           | 48.9 | 702                               | 67.3 | 766                | 65.2 |
| Yes                                                                                                                                                                                 | 67                           | 51.1 | 341                               | 32.7 | 408                | 34.8 |
| <b>Ever seen or heard about tobacco advertising with lucky draw, exchange of old cigarette pack with new ones, bonus to sellers, car stickers, etc. *</b>                           |                              |      |                                   |      |                    |      |
| No                                                                                                                                                                                  | 125                          | 95.4 | 1,025                             | 98.3 | 1,150              | 98.0 |
| Yes                                                                                                                                                                                 | 6                            | 4.6  | 18                                | 1.7  | 24                 | 2.0  |
| <b>Ever seen any goods with the label of any tobacco product being used in promotions (clothes, hats, lighters, key chains, tissue boxes, stationeries, kitchen utensils, etc.)</b> |                              |      |                                   |      |                    |      |
| No                                                                                                                                                                                  | 34                           | 26.0 | 340                               | 32.6 | 703                | 67.4 |



|    |                                                                                              |     |      |       |      |       |
|----|----------------------------------------------------------------------------------------------|-----|------|-------|------|-------|
| 1  |                                                                                              |     |      |       |      |       |
| 2  |                                                                                              |     |      |       |      |       |
| 3  | Yes                                                                                          | 374 | 31.9 | 97    | 74.0 | 800   |
| 4  |                                                                                              |     |      |       |      | 68.1  |
| 5  | <b>Ever seen any toy, comestible or wares made in the form of any tobacco product (toys,</b> |     |      |       |      |       |
| 6  | <b>chewing gums, sweet sticks, key chains, lighters, balloons, etc.)</b>                     |     |      |       |      |       |
| 7  | No                                                                                           | 88  | 67.2 | 702   | 67.3 | 790   |
| 8  |                                                                                              |     |      |       |      | 67.3  |
| 9  | Yes                                                                                          | 43  | 32.8 | 341   | 32.7 | 384   |
| 10 |                                                                                              |     |      |       |      | 32.7  |
| 11 | <b>Ever heard about the announcements of tobacco advertisement at fairs and festivals *</b>  |     |      |       |      |       |
| 12 | No                                                                                           | 128 | 97.7 | 1,040 | 99.7 | 1,168 |
| 13 |                                                                                              |     |      |       |      | 99.5  |
| 14 | Yes                                                                                          | 3   | 2.3  | 3     | 0.3  | 6     |
| 15 |                                                                                              |     |      |       |      | 0.5   |
| 16 | <b>Ever seen or heard about the tobacco advertising as sponsorship or support</b>            |     |      |       |      |       |
| 17 | <b>to sports, funfairs, exhibitions, or any social activities **</b>                         |     |      |       |      |       |
| 18 | No                                                                                           | 70  | 53.4 | 689   | 66.1 | 759   |
| 19 |                                                                                              |     |      |       |      | 64.7  |
| 20 | Yes                                                                                          | 61  | 46.6 | 354   | 33.9 | 415   |
| 21 |                                                                                              |     |      |       |      | 35.3  |
| 22 | <b>Exposure to any kind of TAPS <sup>a)</sup></b>                                            |     |      |       |      |       |
| 23 | No                                                                                           | 8   | 6.1  | 99    | 9.5  | 107   |
| 24 |                                                                                              |     |      |       |      | 9.1   |
| 25 | Yes                                                                                          | 123 | 93.9 | 944   | 90.5 | 1,067 |
| 26 |                                                                                              |     |      |       |      | 90.9  |

\*p<0.05, \*\*p<0.01, \*\*\*p<0.001; <sup>a)</sup>Tobacco advertisement, promotion, and sponsorship, <sup>b)</sup>Current tobacco use,

<sup>c)</sup>No current tobacco use

564

565

**Table 3** Illicit tobacco sale exposures among study participants (N=1,174)

| Illicit tobacco sale                                                                                                               | Use <sup>b)</sup> |      | No use <sup>c)</sup> |      | N |
|------------------------------------------------------------------------------------------------------------------------------------|-------------------|------|----------------------|------|---|
|                                                                                                                                    | (N=131)           |      | (N=1,043)            |      |   |
|                                                                                                                                    | N                 | %    | N                    | %    |   |
| <b>Had seen any smoked tobacco product for sale inside or within 100 feet of the school premises within the last 12 months ***</b> |                   |      |                      |      |   |
| No                                                                                                                                 | 92                | 19.1 | 93                   | 13.4 |   |
| Yes                                                                                                                                | 390               | 80.9 | 599                  | 86.6 |   |
| <b>Had seen the sale or gifting of any smoked tobacco product to minors <sup>a)</sup> within the last 12 months ***</b>            |                   |      |                      |      |   |
| No                                                                                                                                 | 86                | 17.8 | 120                  | 17.3 |   |
| Yes                                                                                                                                | 396               | 82.2 | 572                  | 82.7 |   |
| <b>Had seen the sale or distribution of any smoked tobacco product by minors <sup>a)</sup> within the last 12 months ***</b>       |                   |      |                      |      |   |
| No                                                                                                                                 | 209               | 43.4 | 312                  | 45.1 |   |
| Yes                                                                                                                                | 273               | 56.6 | 380                  | 54.9 |   |
| <b>Had seen the sale of cigarettes singly or in packs less than 20 cigarettes within the last 12 months ***</b>                    |                   |      |                      |      |   |
| No                                                                                                                                 | 50                | 10.4 | 108                  | 15.6 |   |
| Yes                                                                                                                                | 432               | 89.6 | 584                  | 84.4 |   |

\*p<0.05, \*\*p<0.01, \*\*\*p<0.001; <sup>a)</sup>Under 18 years old, <sup>b)</sup>Current tobacco use, <sup>c)</sup>No current tobacco use

566

567

**Table 4** Odds ratio (OR) and 95% confidence interval (CI) of current tobacco use among study participants (N=1,174)

| Characteristics        | Use <sup>a)</sup> | No use <sup>b)</sup> | Unadjusted |                  | Adjusted <sup>c)</sup> |                  |
|------------------------|-------------------|----------------------|------------|------------------|------------------------|------------------|
|                        | (N=131)           | (N=1043)             | OR         | 95% CI           | OR                     | 95% CI           |
|                        | N (%)             | N (%)                |            |                  |                        |                  |
| <b>Age</b>             |                   |                      |            |                  |                        |                  |
| ≤ 14 years             | 14 (10.7)         | 488 (46.8)           | 1          | Reference        | 1                      | Reference        |
| > 14 years             | 117 (89.3)        | 555 (53.2)           | 7.35       | (4.17-12.96)***  | 9.81                   | (4.54-21.19)***  |
| <b>Gender</b>          |                   |                      |            |                  |                        |                  |
| Female                 | 9 (6.9)           | 683 (65.5)           | 1          | Reference        | 1                      | Reference        |
| Male                   | 122 (93.1)        | 360 (34.5)           | 25.72      | (12.91-51.22)*** | 28.06                  | (13.29-59.25)*** |
| <b>Grade</b>           |                   |                      |            |                  |                        |                  |
| 10                     | 56 (42.7)         | 738 (70.8)           | 1          | Reference        | 1                      | Reference        |
| 11                     | 75 (57.3)         | 305 (29.2)           | 3.24       | (2.24-4.70)***   | 1.52                   | (0.85-2.73)      |
| <b>Parent smoking</b>  |                   |                      |            |                  |                        |                  |
| No                     | 128 (97.7)        | 987 (94.6)           | 1          | Reference        | 1                      | Reference        |
| Yes                    | 3 (2.3)           | 56 (5.4)             | 0.41       | (0.13-1.34)      | 0.31                   | (0.08-1.29)      |
| <b>Sibling smoking</b> |                   |                      |            |                  |                        |                  |
| No                     | 118 (90.1)        | 961 (92.1)           | 1          | Reference        | 1                      | Reference        |
| Yes                    | 13 (9.9)          | 82 (7.9)             | 1.29       | (0.70-2.39)      | 1.06                   | (0.47-2.37)      |
| <b>Peer smoking</b>    |                   |                      |            |                  |                        |                  |
| No                     | 119 (90.8)        | 959 (91.9)           | 1          | Reference        | 1                      | Reference        |
| Yes                    | 12 (9.2)          | 84 (8.1)             | 1.15       | (0.61-2.17)      | 0.41                   | (0.17-0.95)      |

**Exposure to any kind of TAPS <sup>a)</sup>**

|     |            |            |      |             |      |                 |
|-----|------------|------------|------|-------------|------|-----------------|
| No  | 89 (6.1)   | 99 (9.5)   | 1    | Reference   | 1    | Reference       |
| Yes | 123 (93.9) | 944 (90.5) | 1.61 | (0.77-3.40) | 6.59 | (2.33-18.64)*** |

**Had seen any smoked tobacco product for sale inside or within 100 feet of the school premises within the last 12 months**

|     |            |            |      |               |      |                |
|-----|------------|------------|------|---------------|------|----------------|
| No  | 9 (6.9)    | 176 (16.9) | 1    | Reference     | 1    | Reference      |
| Yes | 122 (93.1) | 867 (83.1) | 2.75 | (1.37-5.52)** | 4.17 | (1.65-10.58)** |

**Had seen the sale or gifting of any smoked tobacco product to minors <sup>a)</sup> within the last 12 months**

|     |            |            |      |                 |      |                 |
|-----|------------|------------|------|-----------------|------|-----------------|
| No  | 4 (3.1)    | 202 (19.4) | 1    | Reference       | 1    | Reference       |
| Yes | 127 (96.9) | 841 (80.6) | 7.63 | (2.79-20.88)*** | 6.46 | (2.18-19.12)*** |

**Had seen the sale or distribution of any smoked tobacco product by minors <sup>a)</sup> within the last 12 months**

|     |           |            |      |               |      |                |
|-----|-----------|------------|------|---------------|------|----------------|
| No  | 44 (33.6) | 477 (45.7) | 1    | Reference     | 1    | Reference      |
| Yes | 87 (66.4) | 566 (54.3) | 1.67 | (1.14-2.44)** | 2.42 | (1.42-4.10)*** |

**Had seen the sale of cigarettes singly or in packs less than 20 cigarettes within the last 12 months**

|     |            |            |      |                 |      |              |
|-----|------------|------------|------|-----------------|------|--------------|
| No  | 3 (2.3)    | 155 (14.9) | 1    | Reference       | 1    | Reference    |
| Yes | 128 (97.7) | 888 (85.1) | 7.45 | (2.34-23.70)*** | 3.32 | (0.93-11.85) |

**Ever received health education about tobacco use**

|     |           |            |      |                |      |               |
|-----|-----------|------------|------|----------------|------|---------------|
| No  | 70 (53.4) | 393 (37.7) | 1    | Reference      | 1    | Reference     |
| Yes | 61 (46.6) | 650 (62.3) | 0.53 | (0.37-0.76)*** | 0.45 | (0.27-0.78)** |

**Perception of tobacco use**

|     |           |            |      |                |      |                |
|-----|-----------|------------|------|----------------|------|----------------|
| ≤ 7 | 80 (61.1) | 187 (17.9) | 1    | Reference      | 1    | Reference      |
| >7  | 51 (38.9) | 856 (82.1) | 0.14 | (0.10-0.21)*** | 0.17 | (0.10-0.30)*** |

1  
2  
3  
4  
5  
6  
7  
8  
9  
10  
11  
12  
13  
14  
15  
16  
17  
18  
19  
20  
21  
22  
23  
24  
25  
26  
27  
28  
29  
30  
31  
32  
33  
34  
35  
36  
37  
38  
39  
40  
41  
42  
43  
44  
45  
46  
47  
48  
49  
50  
51  
52  
53  
54  
55  
56  
57  
58  
59  
60

---

\*p<0.05, \*\*p<0.01, \*\*\*p<0.001; <sup>a)</sup>Current tobacco use, <sup>b)</sup>No current tobacco use, <sup>c)</sup>Adjusted for age, gender, grade, parent smoking, sibling smoking, peer smoking, ever received health education about tobacco use, and perception of tobacco use, <sup>d)</sup>Under 18 years old

568

For peer review only

1 **STROBE 2007 (v4) Statement—Checklist of items that should be included in reports of**  
 2 ***cross-sectional studies***  
 3

| Section/Topic        | Item # | Recommendation                                                                                                                           | Reported on page # |
|----------------------|--------|------------------------------------------------------------------------------------------------------------------------------------------|--------------------|
| Title and abstract   | 1      | (a) Indicate the study's design with a commonly used term in the title or the abstract                                                   | 1-2                |
|                      |        | (b) Provide in the abstract an informative and balanced summary of what was done and what was found                                      | 2-3                |
| <b>Introduction</b>  |        |                                                                                                                                          |                    |
| Background/rationale | 2      | Explain the scientific background and rationale for the investigation being reported                                                     | 5-9                |
| Objectives           | 3      | State specific objectives, including any prespecified hypotheses                                                                         | 8-9                |
| <b>Methods</b>       |        |                                                                                                                                          |                    |
| Study design         | 4      | Present key elements of study design early in the paper                                                                                  | 9                  |
| Setting              | 5      | Describe the setting, locations, and relevant dates, including periods of recruitment, exposure, follow-up, and data collection          | 9-10               |
| Participants         | 6      | (a) Give the eligibility criteria, and the sources and methods of selection of participants                                              | 9                  |
| Variables            | 7      | Clearly define all outcomes, exposures, predictors, potential confounders, and effect modifiers. Give diagnostic criteria, if applicable | 10-11              |

|                              |     |                                                                                                                                                                                                   |         |
|------------------------------|-----|---------------------------------------------------------------------------------------------------------------------------------------------------------------------------------------------------|---------|
| Data sources/<br>measurement | 8*  | For each variable of interest, give sources of data and details of methods of assessment (measurement). Describe comparability of assessment methods if there is more than one group              | 9-11    |
| Bias                         | 9   | Describe any efforts to address potential sources of bias                                                                                                                                         | 21      |
| Study size                   | 10  | Explain how the study size was arrived at                                                                                                                                                         | 9       |
| Quantitative variables       | 11  | Explain how quantitative variables were handled in the analyses. If applicable, describe which groupings were chosen and why                                                                      | 10-11   |
| Statistical methods          | 12  | (a) Describe all statistical methods, including those used to control for confounding                                                                                                             | 11      |
|                              |     | (b) Describe any methods used to examine subgroups and interactions                                                                                                                               | -       |
|                              |     | (c) Explain how missing data were addressed                                                                                                                                                       | 9       |
|                              |     | (d) If applicable, describe analytical methods taking account of sampling strategy                                                                                                                | -       |
|                              |     | (e) Describe any sensitivity analyses                                                                                                                                                             | -       |
| <b>Results</b>               |     |                                                                                                                                                                                                   |         |
| Participants                 | 13* | (a) Report numbers of individuals at each stage of study—eg numbers potentially eligible, examined for eligibility, confirmed eligible, included in the study, completing follow-up, and analysed | 9,11-12 |

|                  |     |                                                                                                                                                                                                              |                                        |
|------------------|-----|--------------------------------------------------------------------------------------------------------------------------------------------------------------------------------------------------------------|----------------------------------------|
|                  |     | (b) Give reasons for non-participation at each stage                                                                                                                                                         | -                                      |
|                  |     | (c) Consider use of a flow diagram                                                                                                                                                                           | -                                      |
| Descriptive data | 14* | (a) Give characteristics of study participants (eg demographic, clinical, social) and information on exposures and potential confounders                                                                     | 11-13<br>Table 1 to 3                  |
|                  |     | (b) Indicate number of participants with missing data for each variable of interest                                                                                                                          | 9                                      |
| Outcome data     | 15* | Report numbers of outcome events or summary measures                                                                                                                                                         | 11-14<br>Table 1<br>Table 2<br>Table 3 |
| Main results     | 16  | (a) Give unadjusted estimates and, if applicable, confounder-adjusted estimates and their precision (eg, 95% confidence interval). Make clear which confounders were adjusted for and why they were included | 13-14<br>Table 4                       |
|                  |     | (b) Report category boundaries when continuous variables were categorized                                                                                                                                    | -                                      |
|                  |     | (c) If relevant, consider translating estimates of relative risk into absolute risk for a meaningful time period                                                                                             | -                                      |
| Other analyses   | 17  | Report other analyses done—eg analyses of subgroups and interactions, and sensitivity analyses                                                                                                               | -                                      |



|                          |    |                                                                                                                                                                            |       |
|--------------------------|----|----------------------------------------------------------------------------------------------------------------------------------------------------------------------------|-------|
| <b>Discussion</b>        |    |                                                                                                                                                                            |       |
| Key results              | 18 | Summarise key results with reference to study objectives                                                                                                                   | 14    |
| Limitations              | 19 | Discuss limitations of the study, taking into account sources of potential bias or imprecision. Discuss both direction and magnitude of any potential bias                 | 21    |
| Interpretation           | 20 | Give a cautious overall interpretation of results considering objectives, limitations, multiplicity of analyses, results from similar studies, and other relevant evidence | 14-21 |
| Generalisability         | 21 | Discuss the generalisability (external validity) of the study results                                                                                                      | 21    |
| <b>Other information</b> |    |                                                                                                                                                                            |       |
| Funding                  | 22 | Give the source of funding and the role of the funders for the present study and, if applicable, for the original study on which the present article is based              | 23    |

4

\*Give information separately for cases and controls in case-control studies and, if applicable, for exposed and unexposed groups in cohort and cross-sectional studies.

**Note:** An Explanation and Elaboration article discusses each checklist item and gives methodological background and published examples of transparent reporting. The STROBE checklist is best used in conjunction with this article (freely available on the Web sites of PLoS Medicine at <http://www.plosmedicine.org/>, Annals of Internal Medicine at <http://www.annals.org/>, and Epidemiology at <http://www.epidem.com/>). Information on the STROBE Initiative is available at [www.strobe-statement.org](http://www.strobe-statement.org).

15
